# Supplementary material for: Impaired liver regeneration in aged mice can be rescued by silencing Hippo core kinases MST1 and MST2
Source: PubMed Central journal article supplement (PMC5210079; doi:10.15252/emmm.201506089), 2016-12-09
Supplement: EMMM-9-46-s001.pdf [file EMMM-9-46-s001.pdf]

## Appendix

### Rescue of impaired liver regeneration in aged mice by silencing the Hippo pathway

Giulio Loforese<sup>1</sup>, Thomas Malinka<sup>1</sup>, Adrian Keogh<sup>1</sup>, Felix Baier<sup>1</sup>, Cedric Simillion<sup>2</sup>, Thanos D. Halazonetis<sup>3</sup>, Daniel Candinas<sup>1</sup> and Deborah Stroka<sup>1</sup>

#### Table of Contents

**Figure S1** MST1, LATS and MST2 protein expression during liver regeneration

**Figure S2** Validation of LATS1 and p-LATS1 antibody specificity by Western blot.

**Figure S3** RT-qPCR of regenerating mouse liver tissue sham, 6, 24 and 48 following PH

**Figure S4** Western blot detection of p-LATS in young and aged liver post PH

**Figure S5** Screening for siRNA sequences targeting the Hippo core kinases MST1 and MST2 in BNL mouse cell line.

**Figure S6** Pathway analysis of siMST versus siScr  
Genomic microarray was performed on liver samples on day 3 following injection of either siMST or siScr. Pathway analysis was performed using the SetRank method.

**Figure S7** Heat maps of genes regulated by siMST compared to siScr

- A Interferon gamma signalling
- B extracellular matrix remodelling
- C mitotic prometaphase

**Figure S8** Assessment of liver injury and off target effects from siRNA:liposomes

**Figure S9** Measurement of hepatocyte dimensions

**Figure S10** Serum transaminases (ALT and AST) and alkaline phosphatase (ALP) in regenerating aged livers  $\pm$  MST KD (aged MST)

Appendix Figure S1

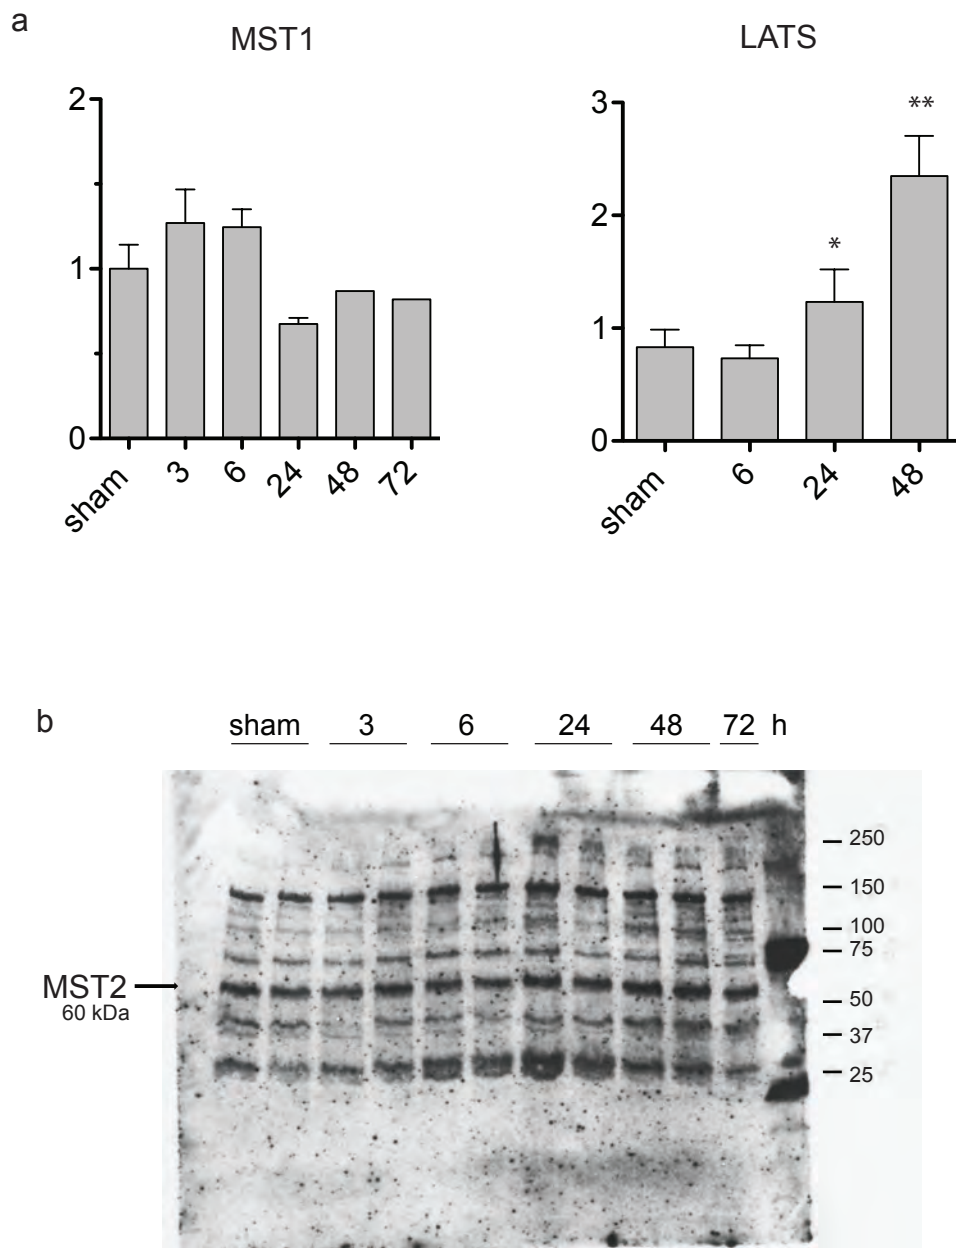

**Figure S1 MST1, LATS and MST2 protein expression during liver regeneration**

A MST and LATS total protein quantification from Figure 1B.

Data are presented as mean  $\pm$  SD. p values were calculated with Student's t-test comparing values at each time point to sham operated control tissue compared to sham controls.

B MST2 Western blot membrane. MST2 migrates at approximately 60kDa.

Appendix Figure S2

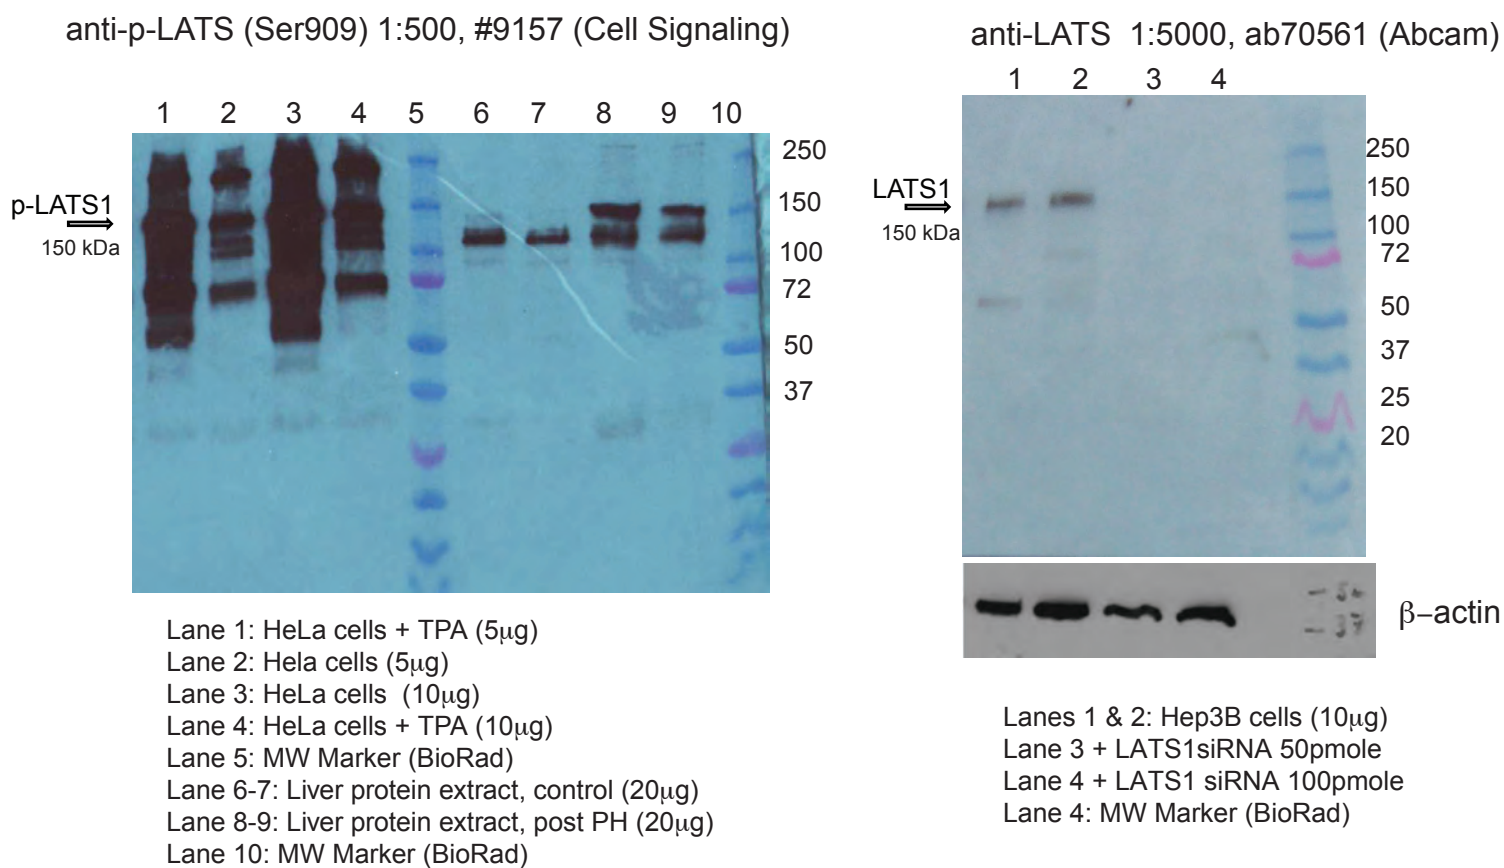

**Figure S2 Validation of LATS1 and p-LATS1 antibody specificity by Western blot.**

### Appendix Figure S3

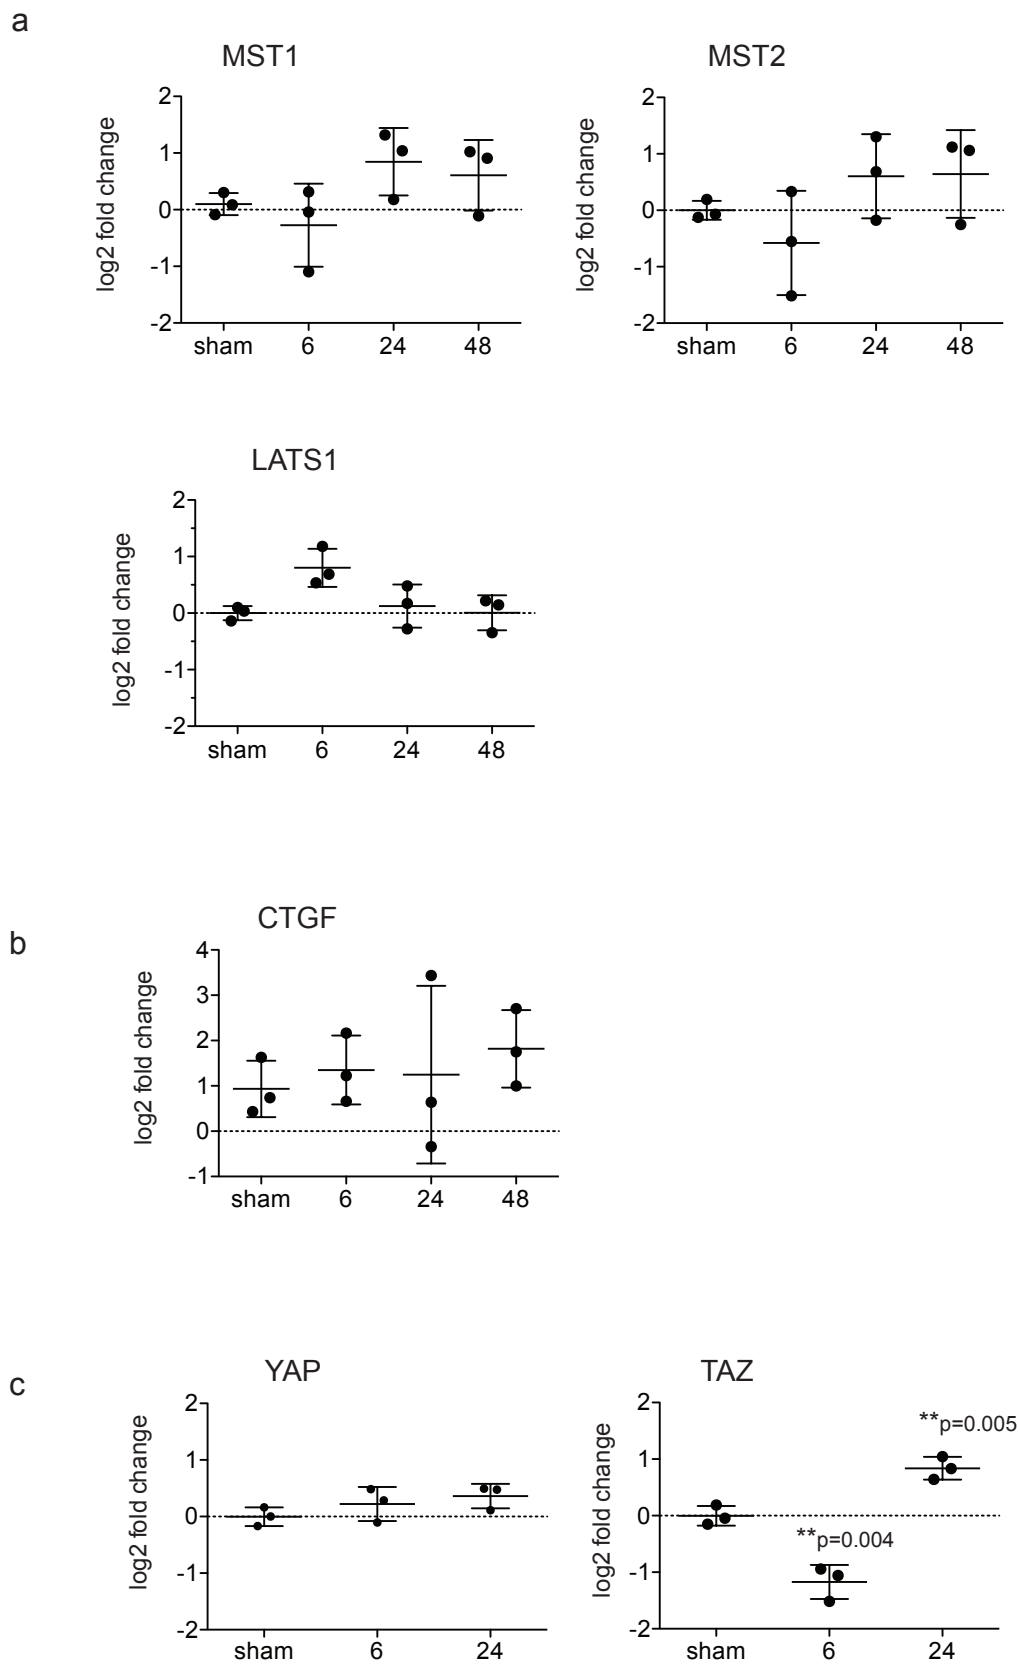

**Figure S3 RT-qPCR of regenerating mouse liver tissue sham, 6, 24 and 48 following PH**

Data are presented as mean  $\pm$  SD. p values were calculated with a student's t-test and time points were compared to sham controls.

## Appendix Figure S4

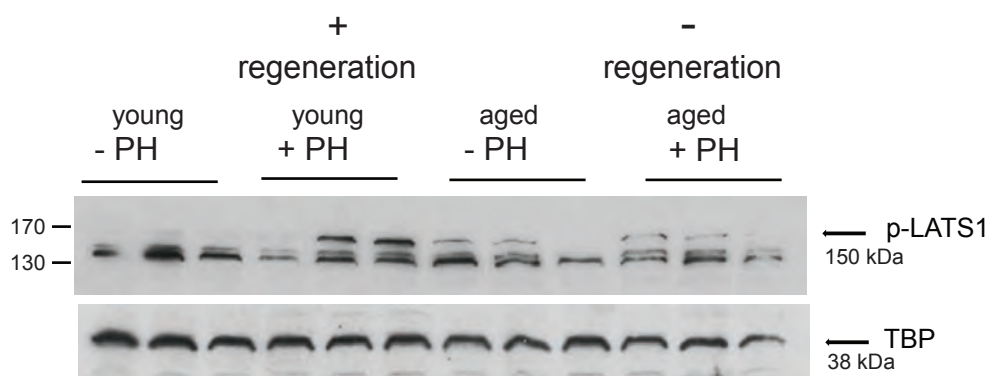

**Figure S4 Western blot detection of p-LATS in young and aged liver post PH**

Liver protein extracts were isolated from young and aged mice without (-) and with (+) a partial hepatectomy. At 40 h post PH, young mice were determined to be regenerating (+) and aged mice were non-regenerating (-). TBP was used as a loading control. Each band is from an independent animal.

Appendix Figure S5

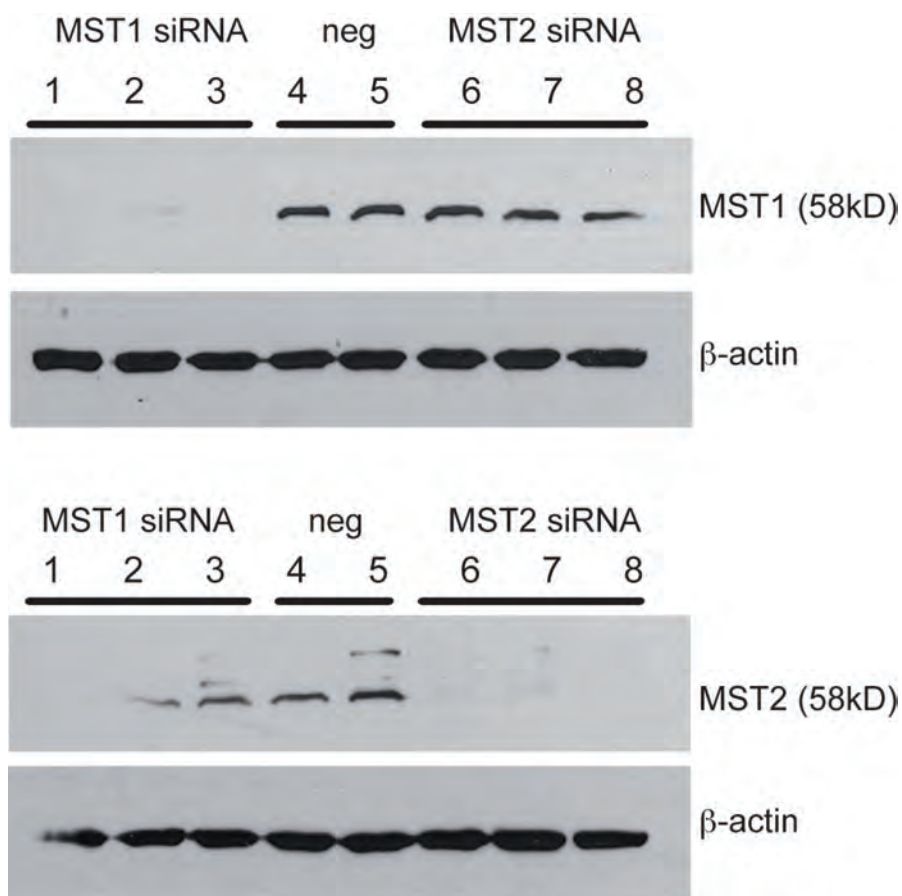

**Figure S5 Screening for siRNA sequences targeting the Hippo core kinases MST1 and MST2 in BNL mouse cell line.**

(A) MST1 and (B) MST2 protein levels analysed by western blot 24 h after siRNA transfection.  $\beta$ -actin was used as protein loading control.

Lane 1) MST1/STK4 sequence ID: s81598.

Lane 2) MST1/STK4 sequence ID: s81597

Lane 3) MST1/STK4 sequence ID: s81599

Lane 4) negative control sequence

Lane 5) negative control sequence

Lane 6) MST2/STK3 sequence ID:S211749

Lane 7) MST2/STK3 sequence ID:S211750

Lane 8) MST2/STK3 sequence ID:S211751



**Figure S6 – Pathway analysis of siMST versus siScr**

Genomic microarray was performed on liver samples on day 3 following injection of either siMST or siScr. Pathway analysis was performed using the SetRank method.



# A Interferon gamma signaling

Appendix Figure S7

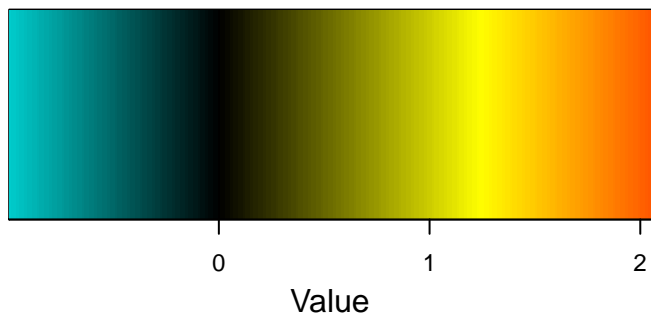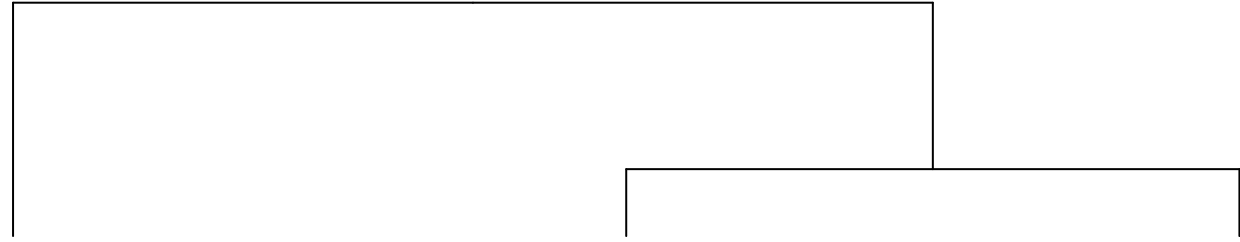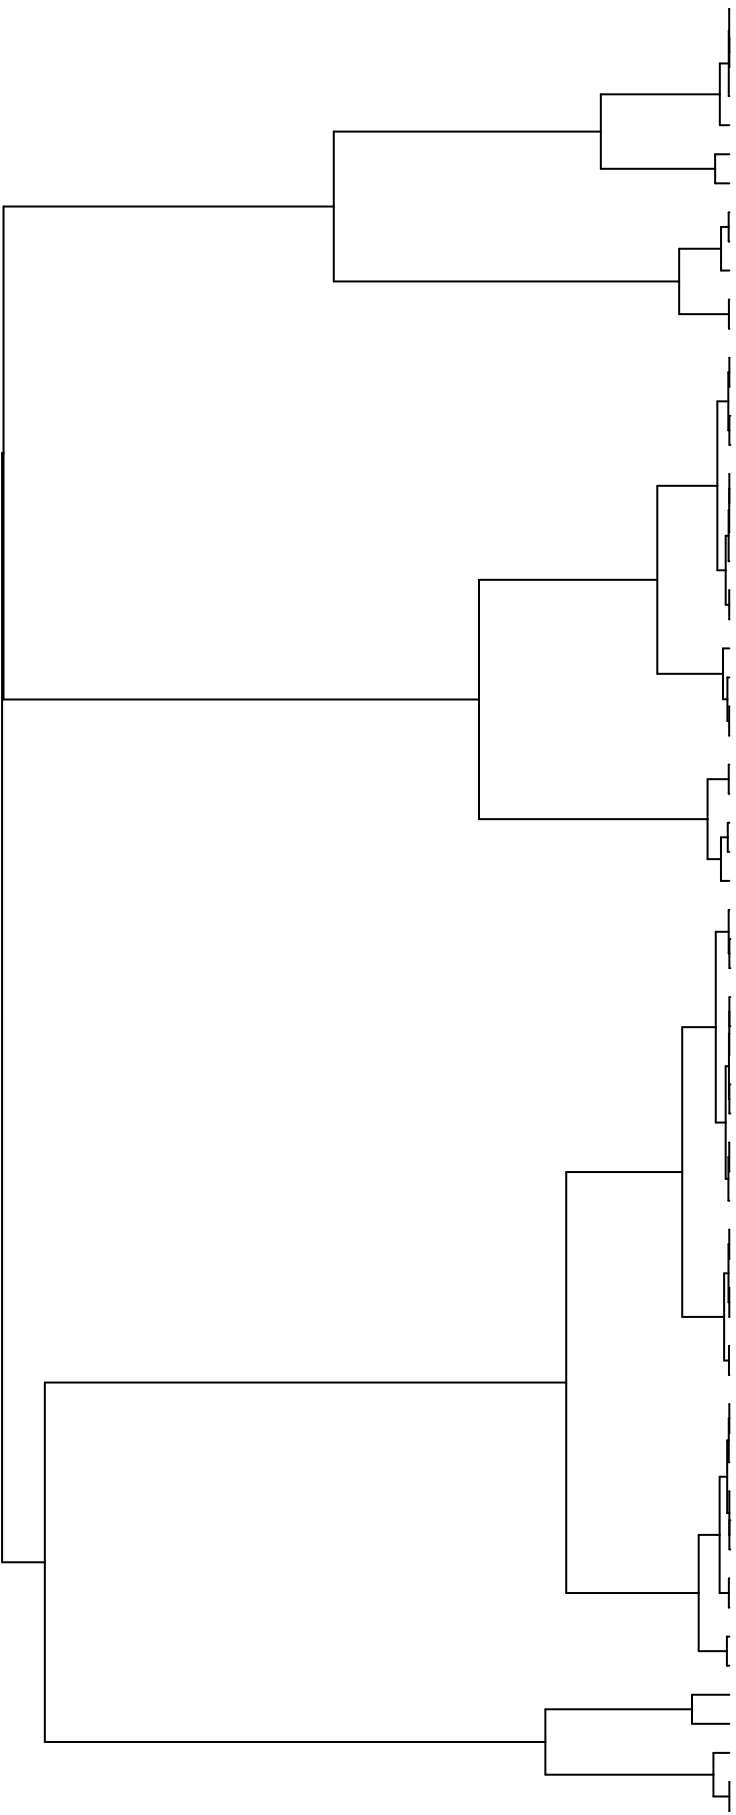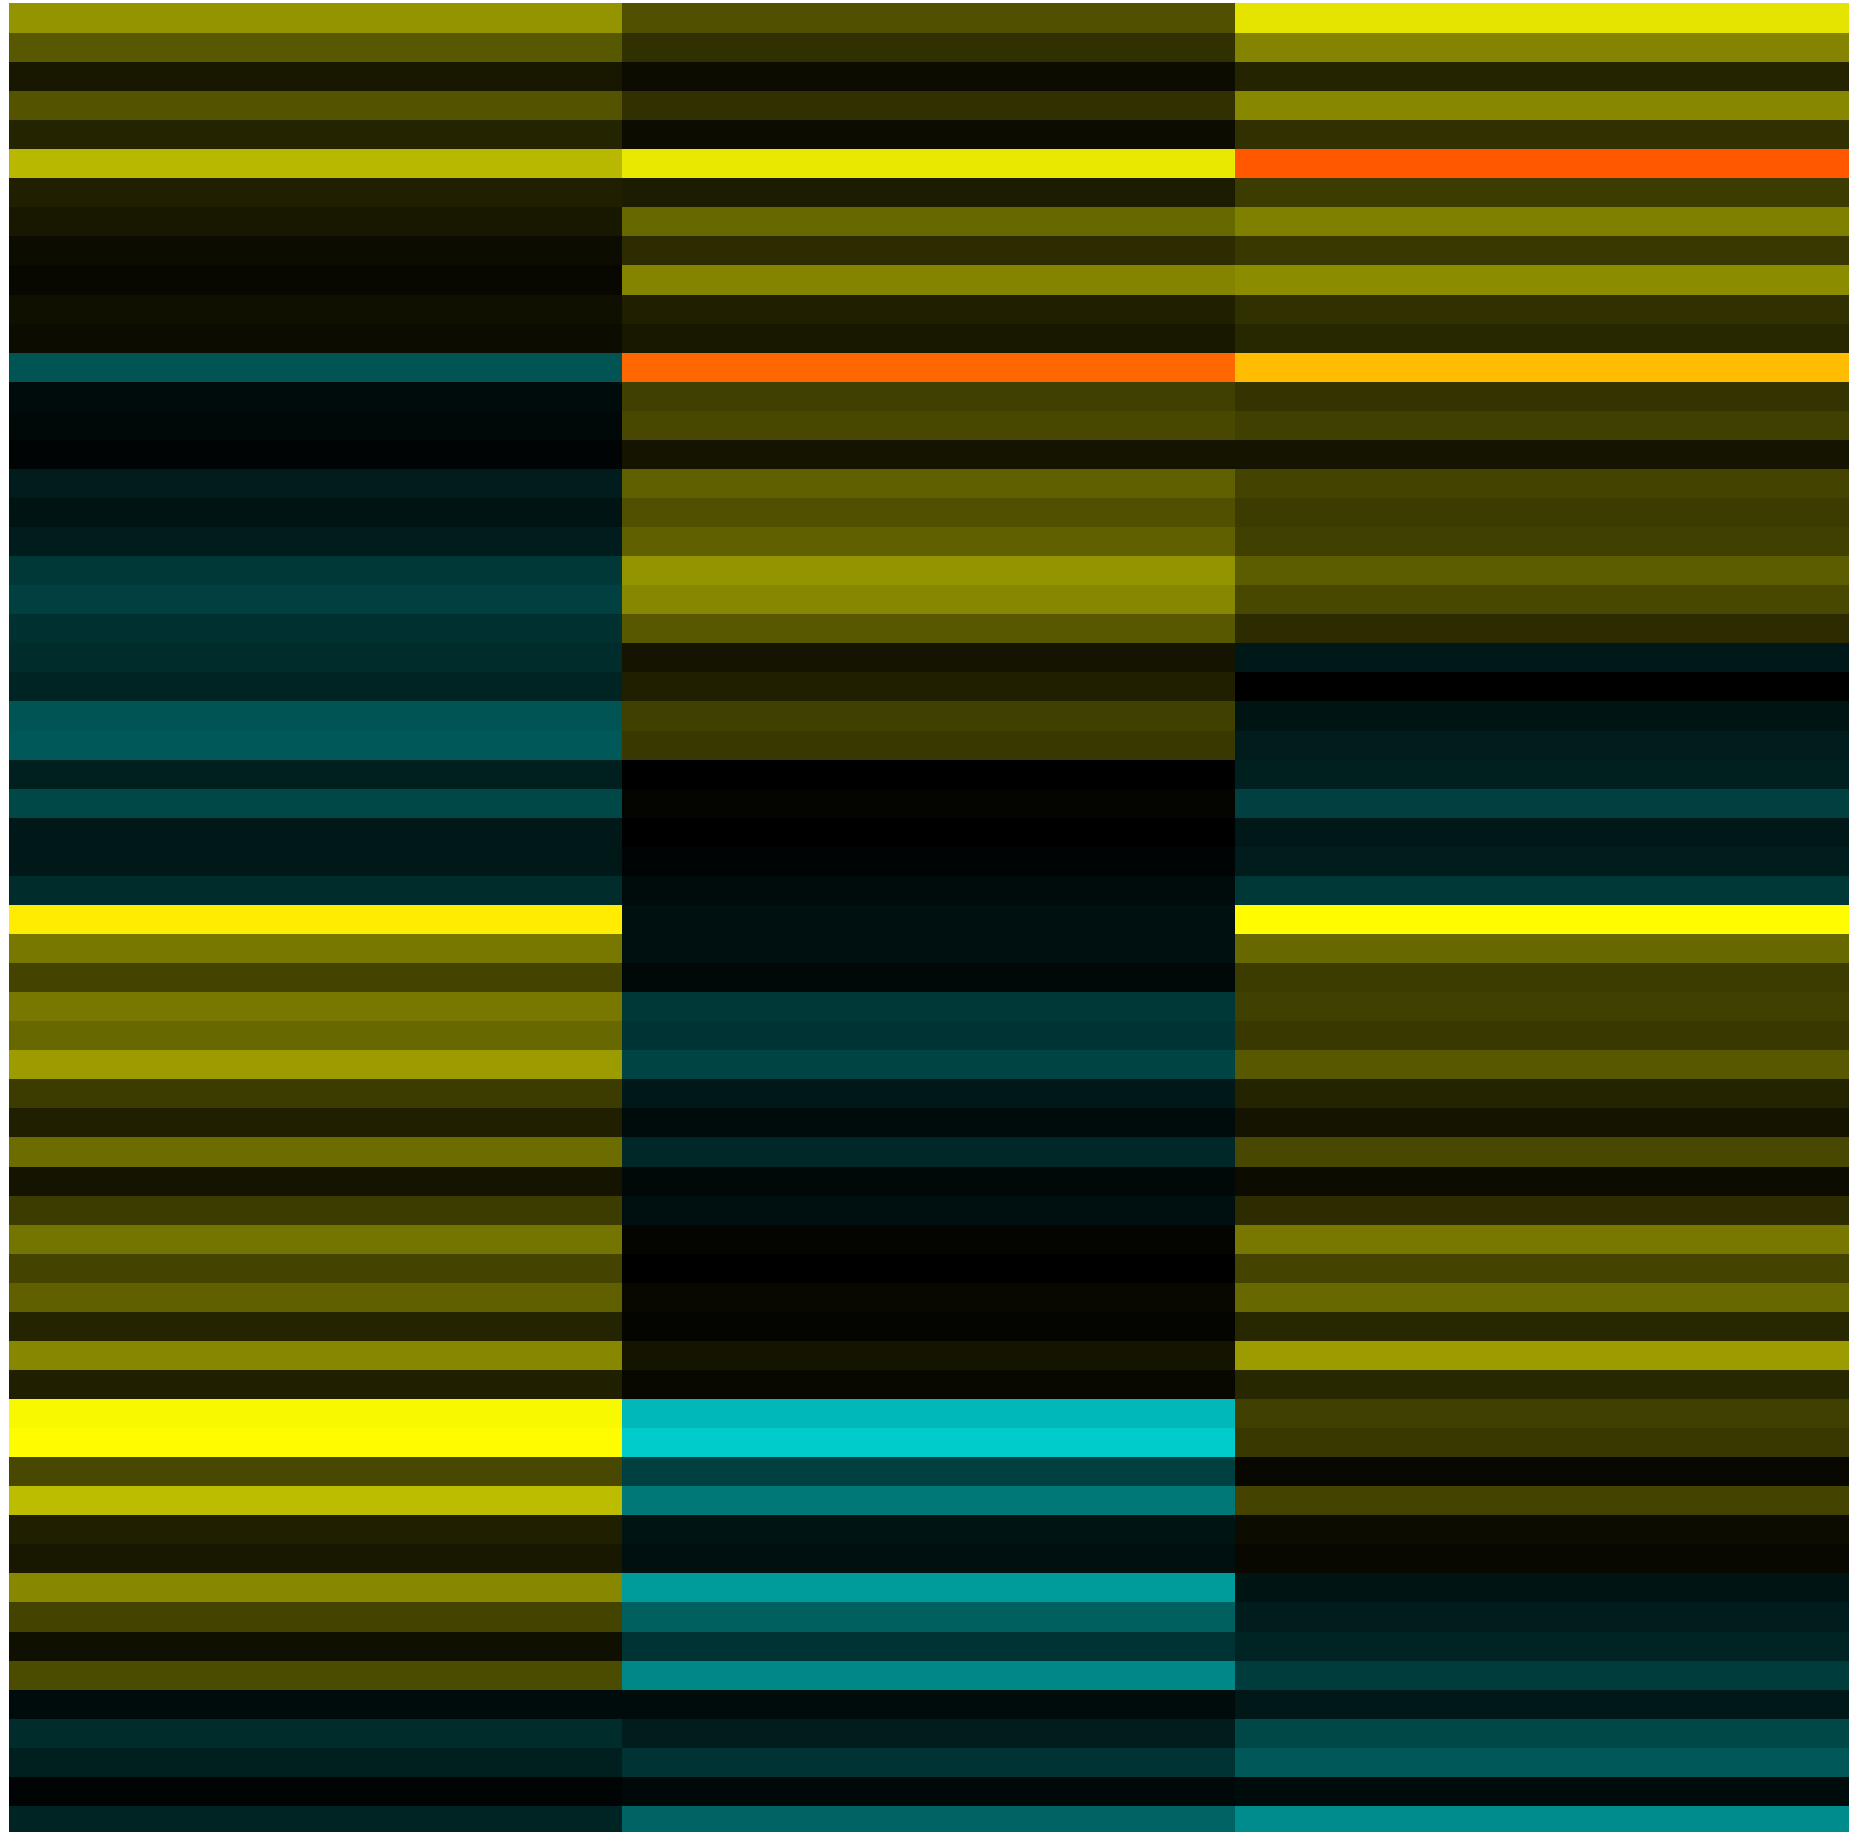

- Gbp2
- Ifi30
- 4933411G06Rik
- Cd44
- Camk2b
- Vcam1
- Prkcd
- Irf8
- Ifngr2
- Ptpn2
- Jak1
- Gm8909
- Socs3
- Irf2
- Socs1
- H2-Eb2
- Ptpn1
- Ncam1
- H2-Q2
- Icam1
- Irf1
- Gm11127
- H2-B1
- Ptpn11
- Ciita
- Oas1d
- Irf3
- Oas1h
- Oas1e
- Camk2g
- H2-Eb1
- Irf7
- H2-Q7
- H2-D1
- Oas2
- Sumo1
- Fcgr1
- H2-Q1
- Pias1
- Irf9
- B2m
- H2-T23
- H2-Q4
- H2-K1
- Oas3
- Ptafr
- Oas1a
- Ifngr1
- Oas1
- Oas1g
- Stat1
- Sp100
- Ptpn6
- Ifng
- Gbp2b
- Oas1b
- Oas1c
- Pml
- H2-Q10
- Camk2a
- H2-Ab1
- Camk2d
- H2-Aa

siMST vs siScr

siScr vs control

siMST vs control

## B Mitotic Prometaphase

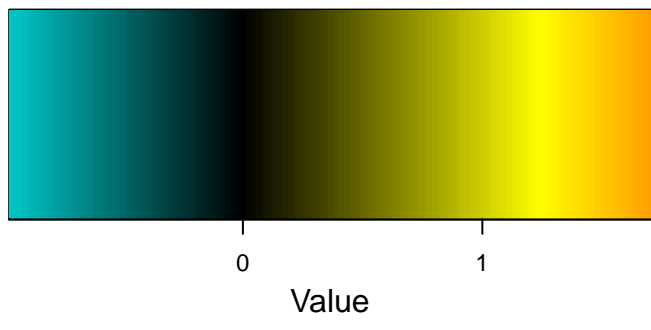

siScr vs control

siMST vs control

siMST vs siScr

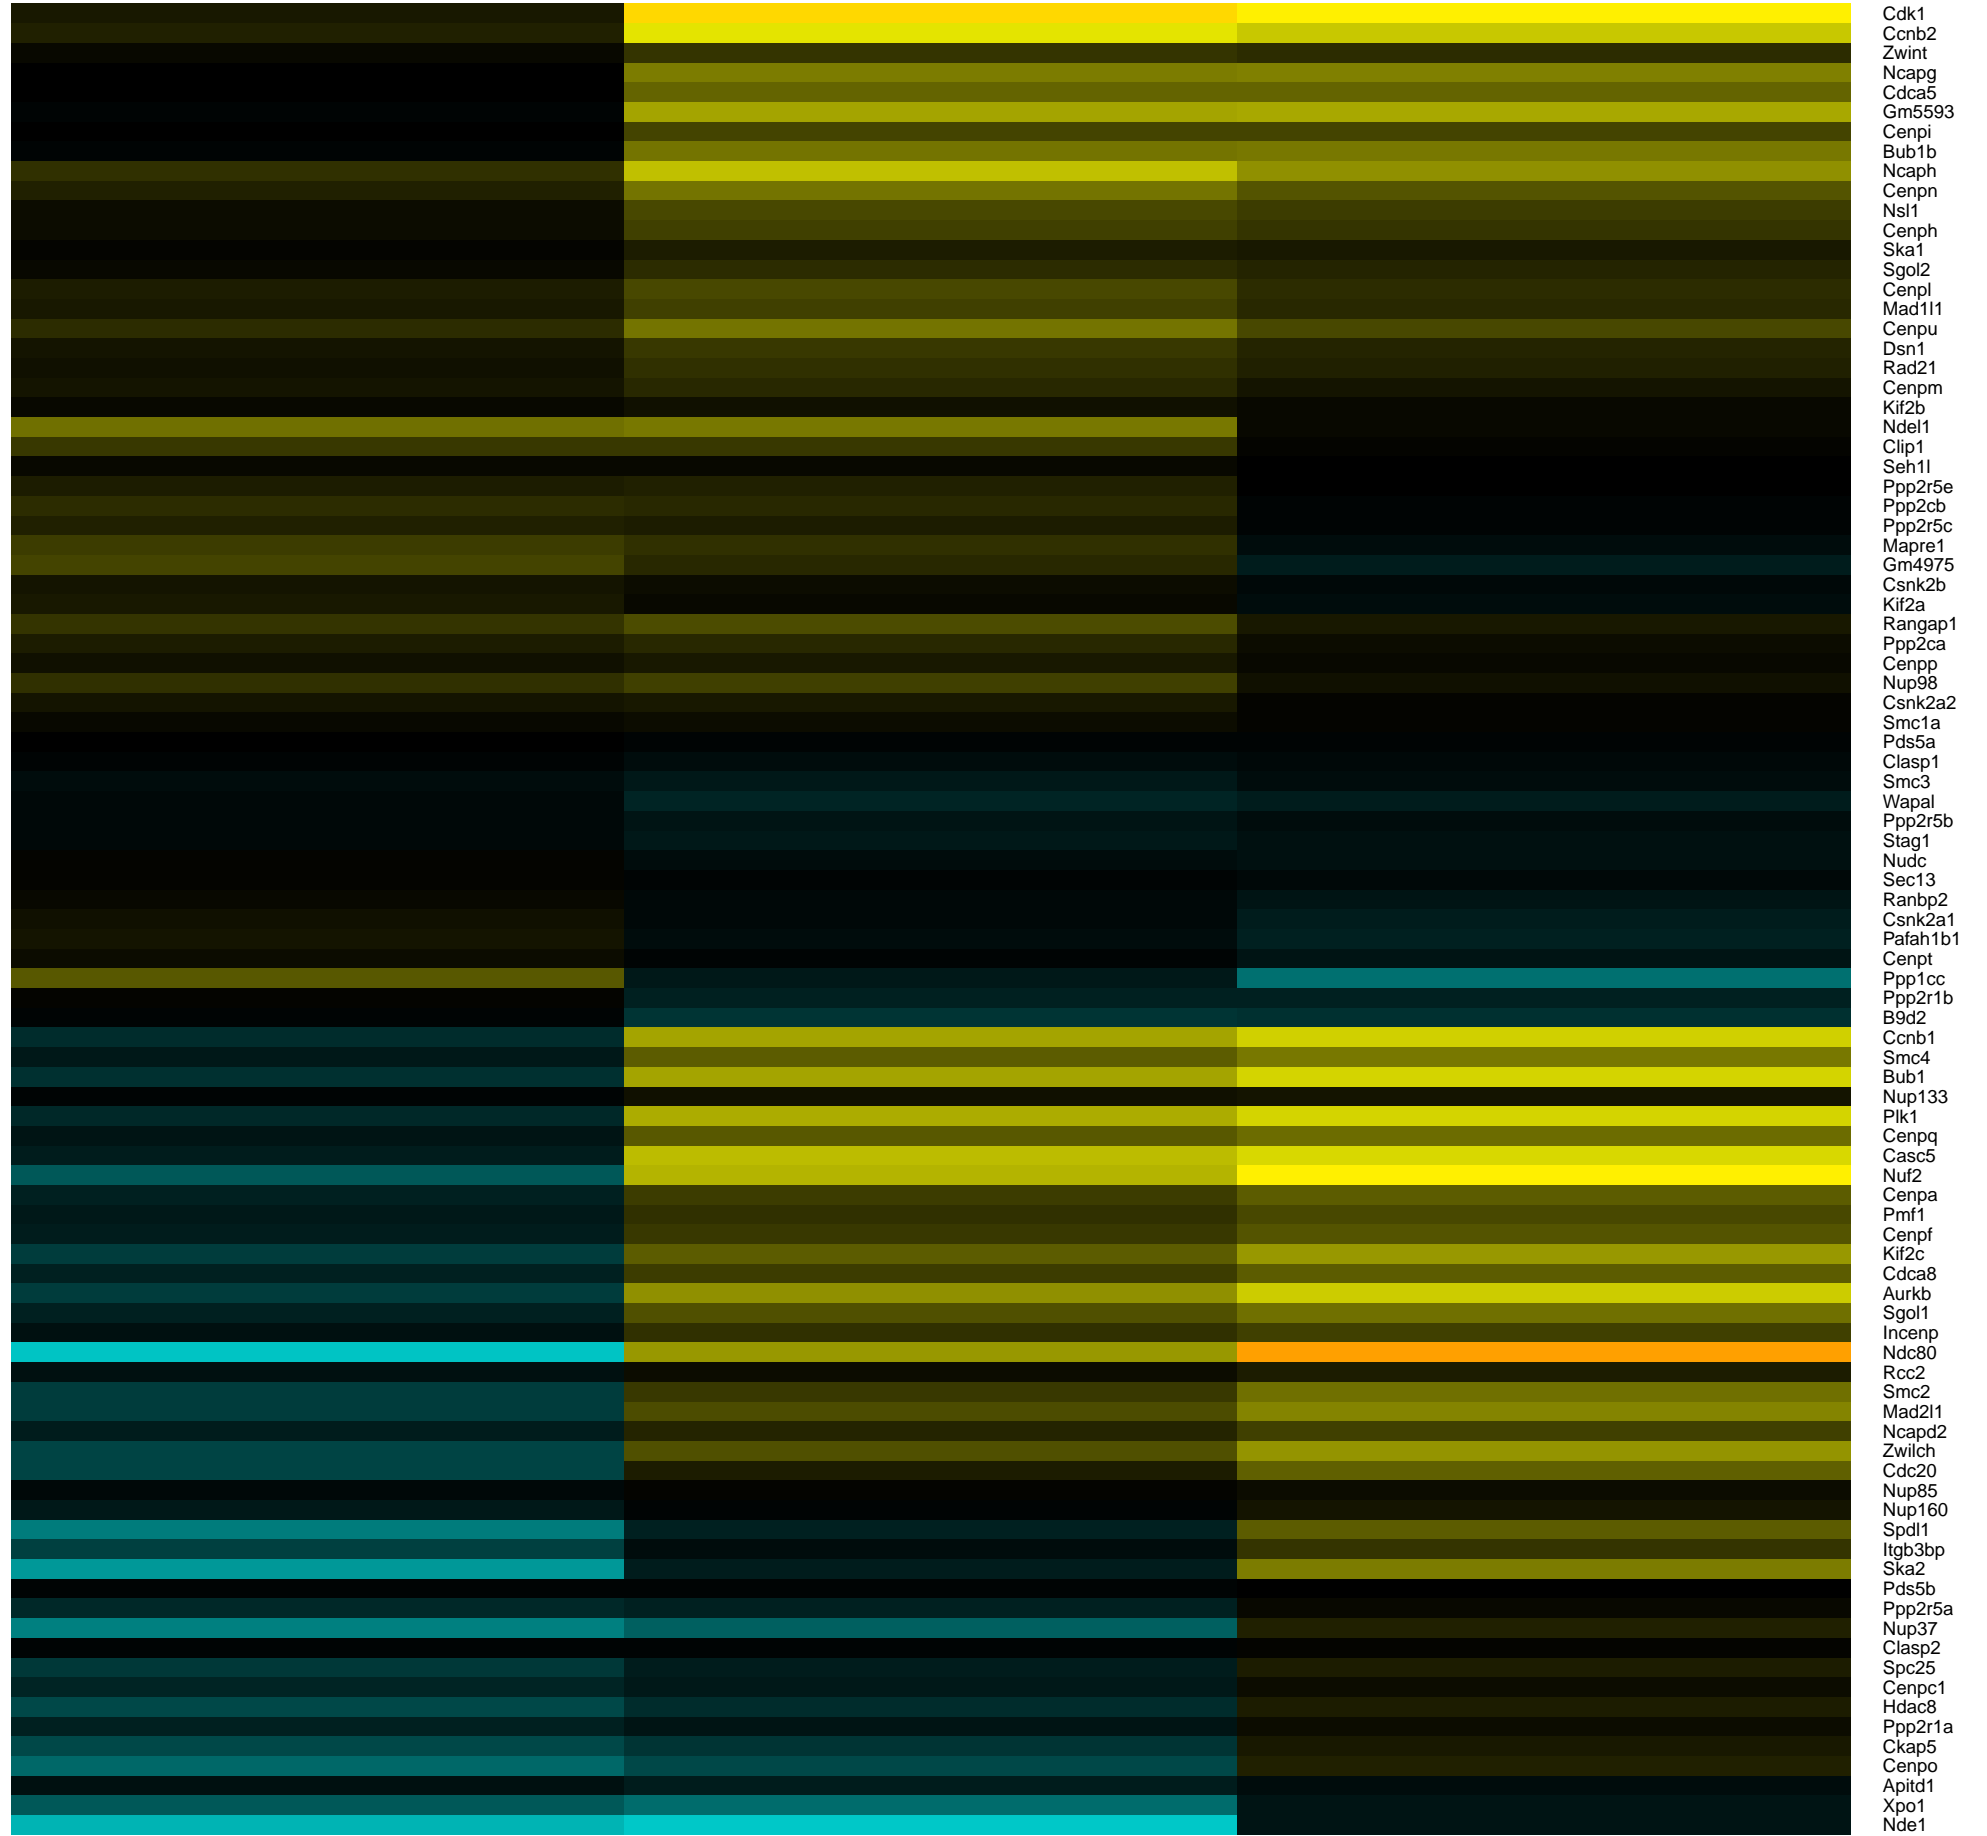

# C extracellular matrix part

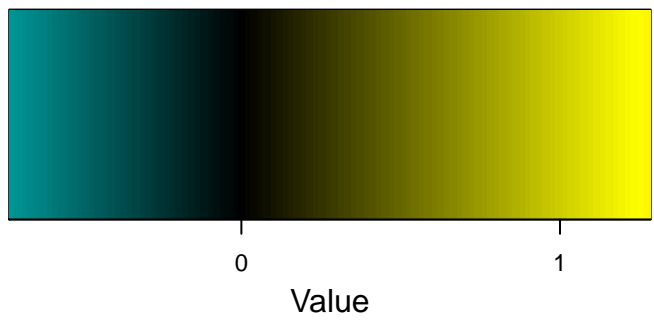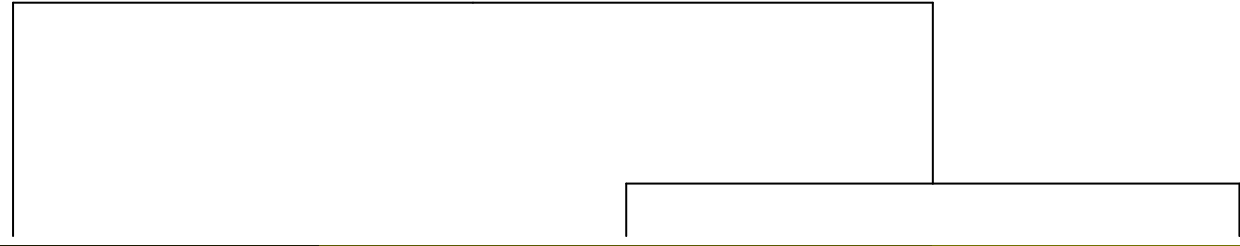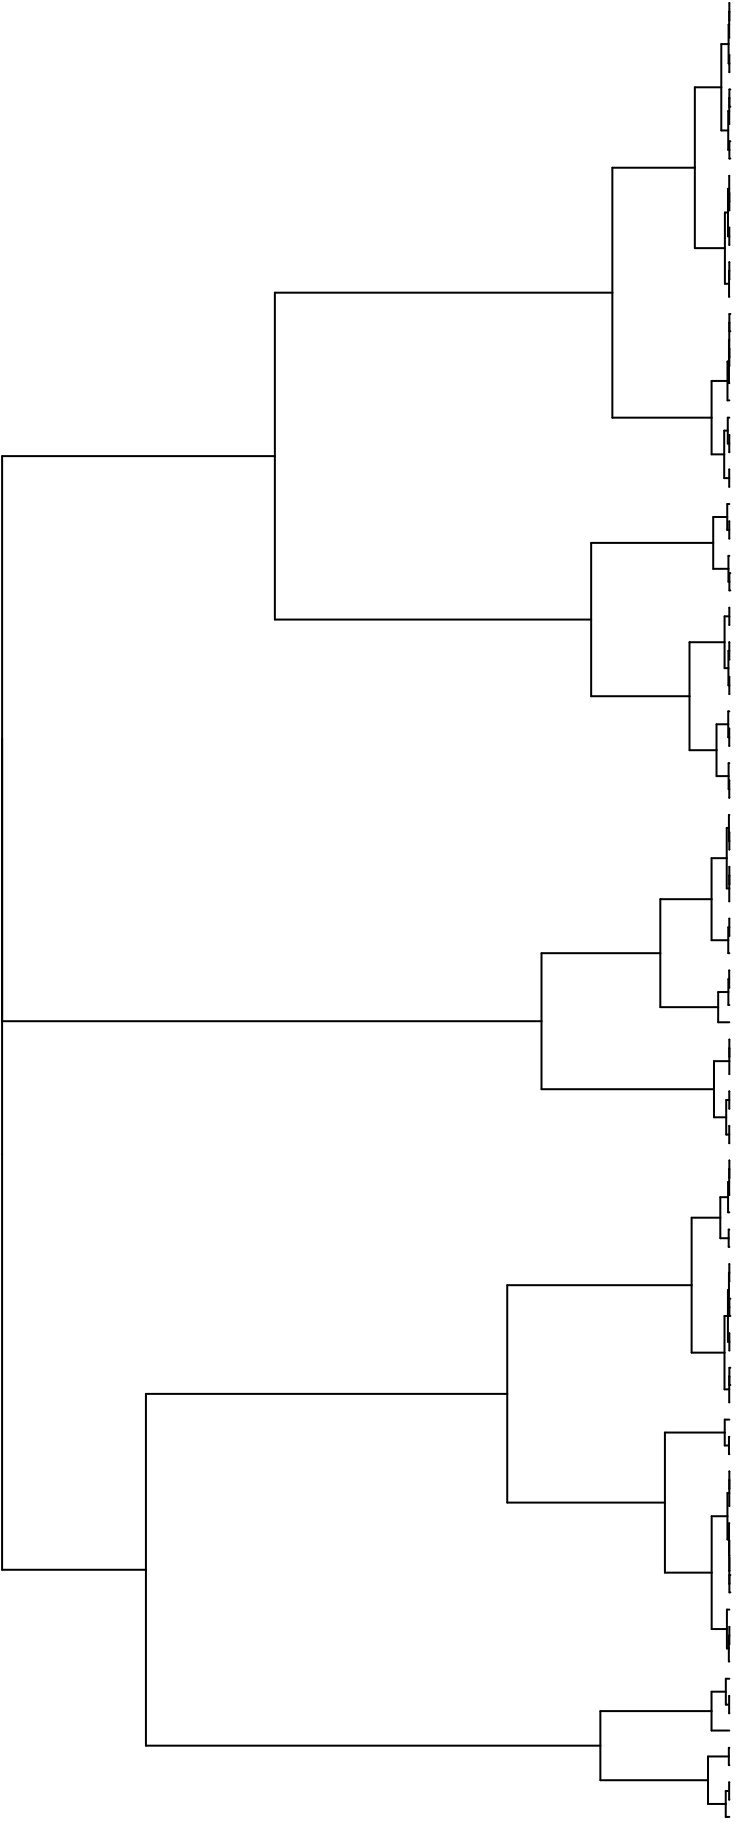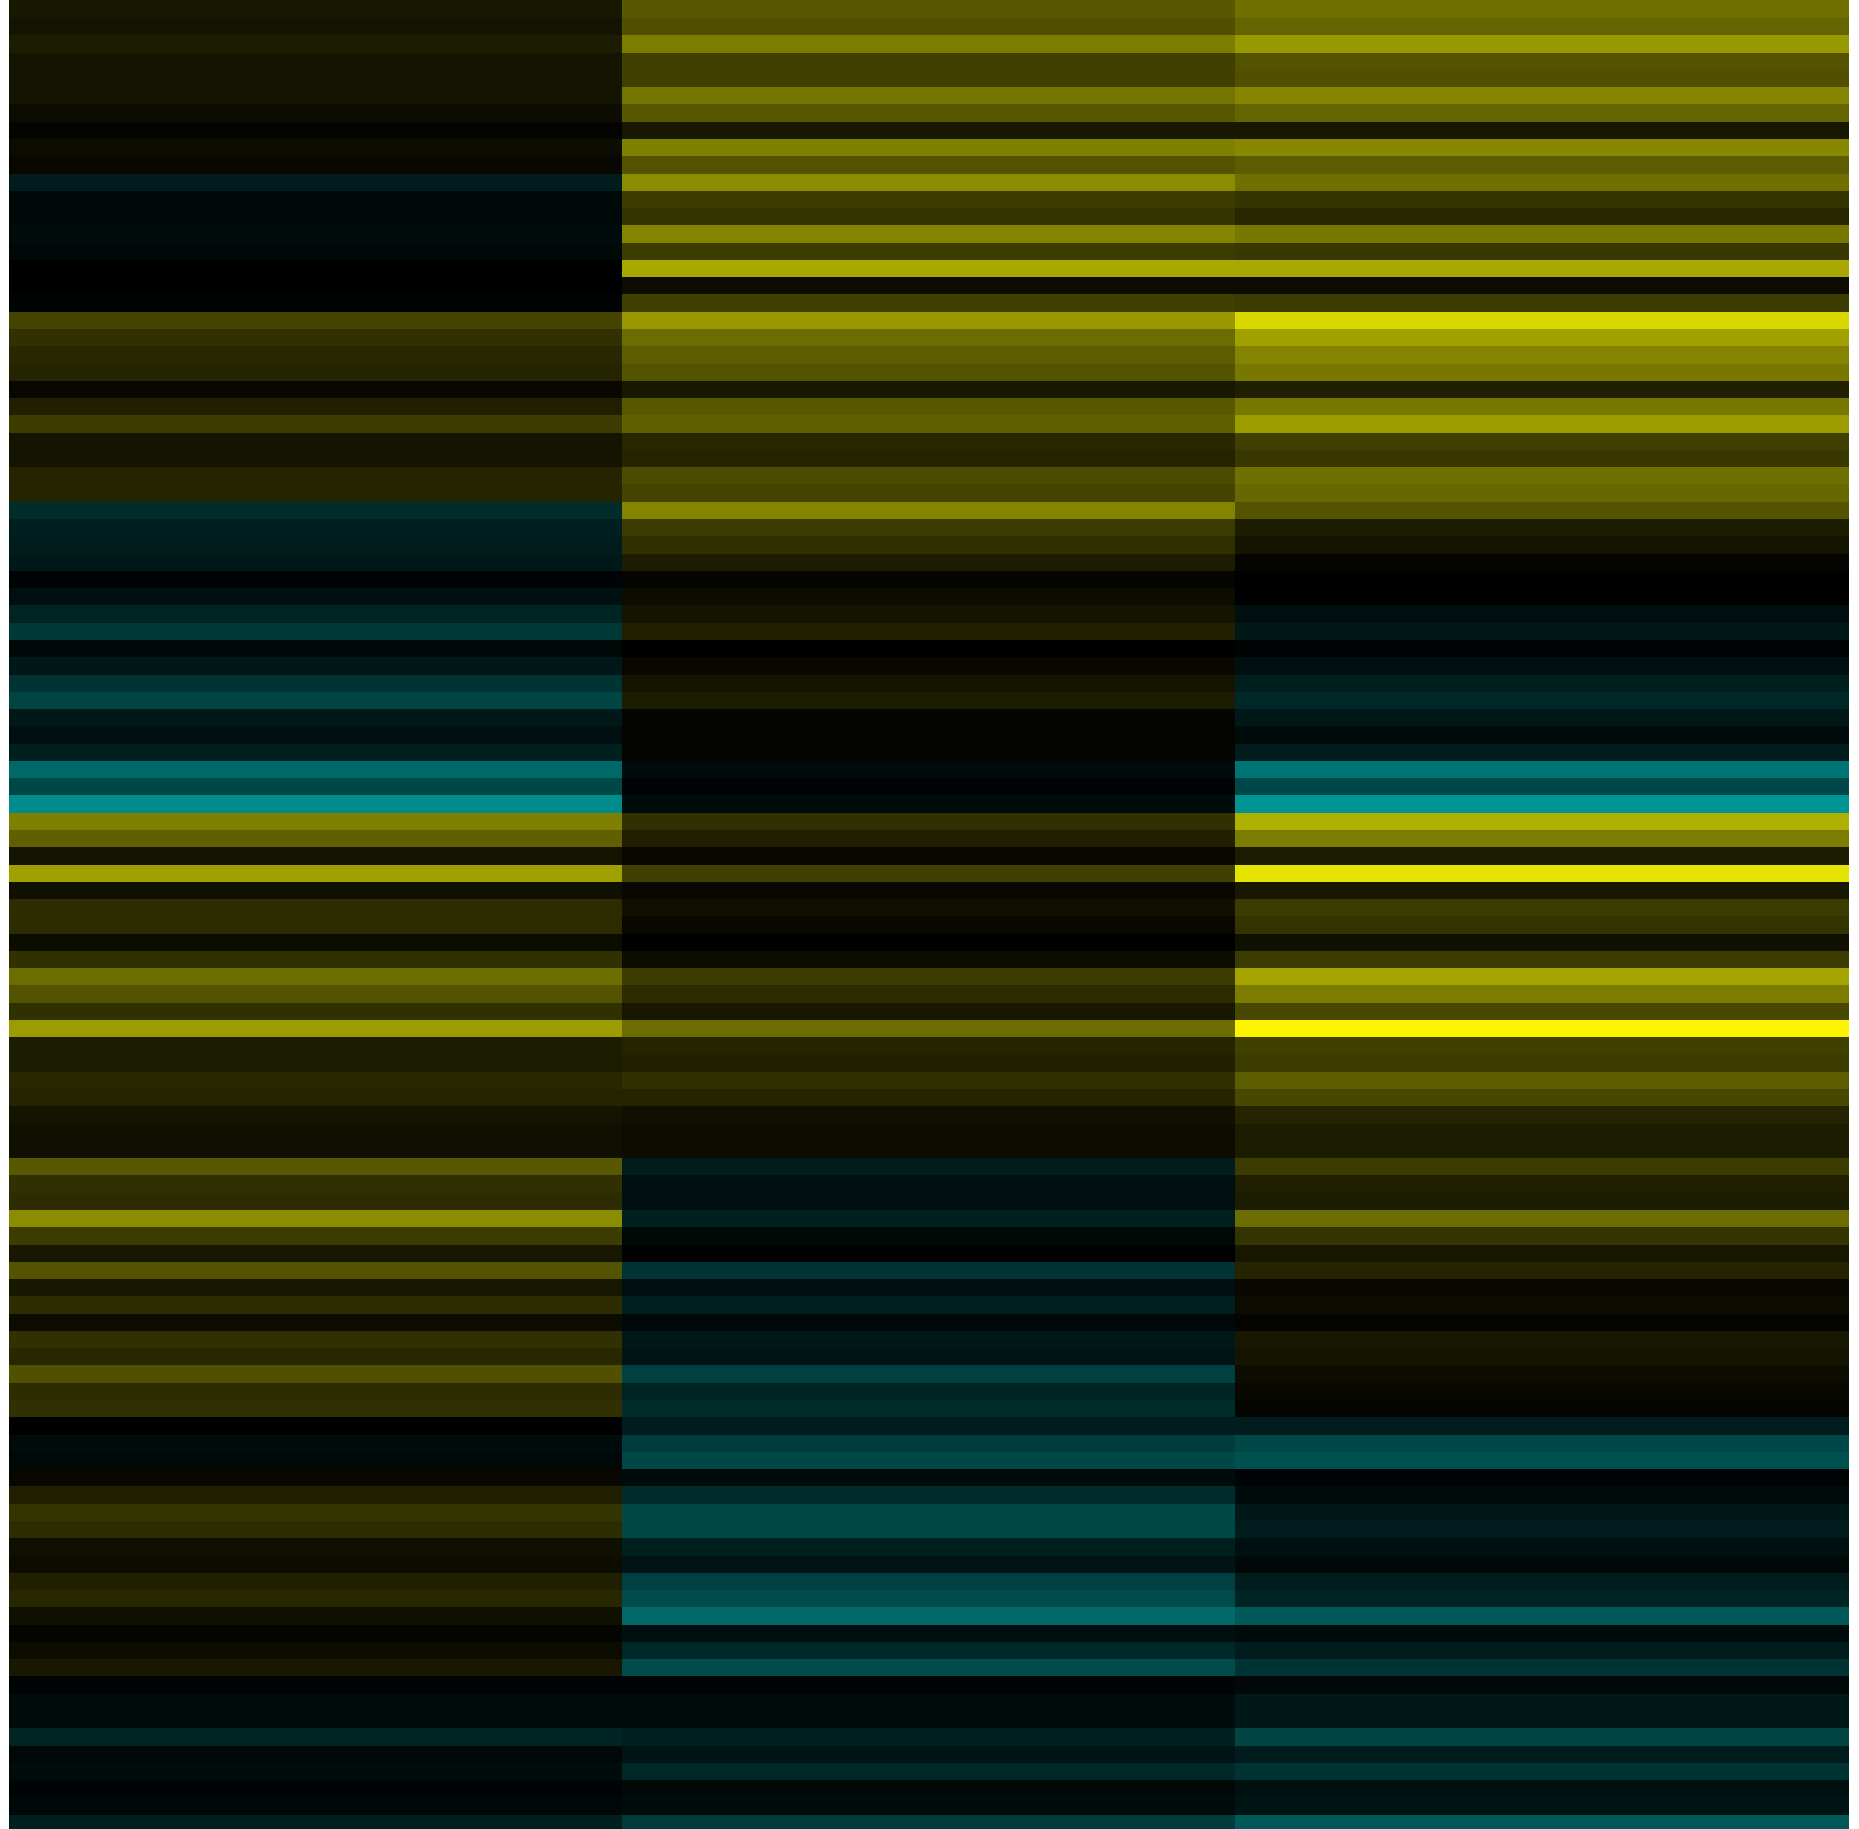

- Mmrn2
- Lamb1
- Loxl2
- Loxl1
- Col1a2
- Thbs2
- Fbln5
- Leprel1
- Sparc
- Ccdc80
- Fbn1
- Lama1
- Ntn1
- Col3a1
- Smoc2
- Col1a1
- Egflam
- Hspg2
- Timp3
- Tnc
- Tgfbj
- Timp2
- Entpd2
- Matn2
- Anxa2
- Lamc1
- Lamb2
- Col12a1
- Nid1
- Lum
- Tinag
- Ntn4
- Amelx
- Hmcn2
- Eln
- Agrn
- Nid2
- Col7a1
- Col18a1
- Col5a3
- Gria3
- Ctdp1
- Frem2
- Frem1
- Lepre1
- Slc1a3
- Lad1
- Timp1
- Col4a2
- Spn
- Mfap4
- Cst3
- Tgfb2
- Ang2
- Rel2
- Smoc1
- Mmp13
- Col4a1
- Runx1
- Entpd1
- Lama4
- Fbln1
- Lama2
- Col5a2
- Col8a2
- Dlg1
- Egfl6
- Col4a5
- Col11a2
- Vwa1
- Adamts1
- Frem3
- Lama5
- Col8a1
- Mfap2
- Col4a4
- Col4a6
- Prss12
- Thbs4
- Lamb3
- Grin1
- Itga6
- Lamc3
- Mfap1a
- Col27a1
- Gsto1
- Papln
- Vwc2
- Rpsa
- Vwa2
- Cask
- Ache
- Mfap5
- Ang
- Fbn2
- Col2a1
- Acan
- Alb
- Smc3
- Amtn
- Col28a1
- Col4a3
- Dag1
- Trf
- Adamts15
- Col15a1

siScr vs control

siMST vs siScr

siMST vs control

**Figure S7– Heat maps of genes regulated by siMST compared to siScr**

- A Interferon gamma signalling
- B extracellular matrix remodelling
- C mitotic prometaphase

## Appendix Figure S8

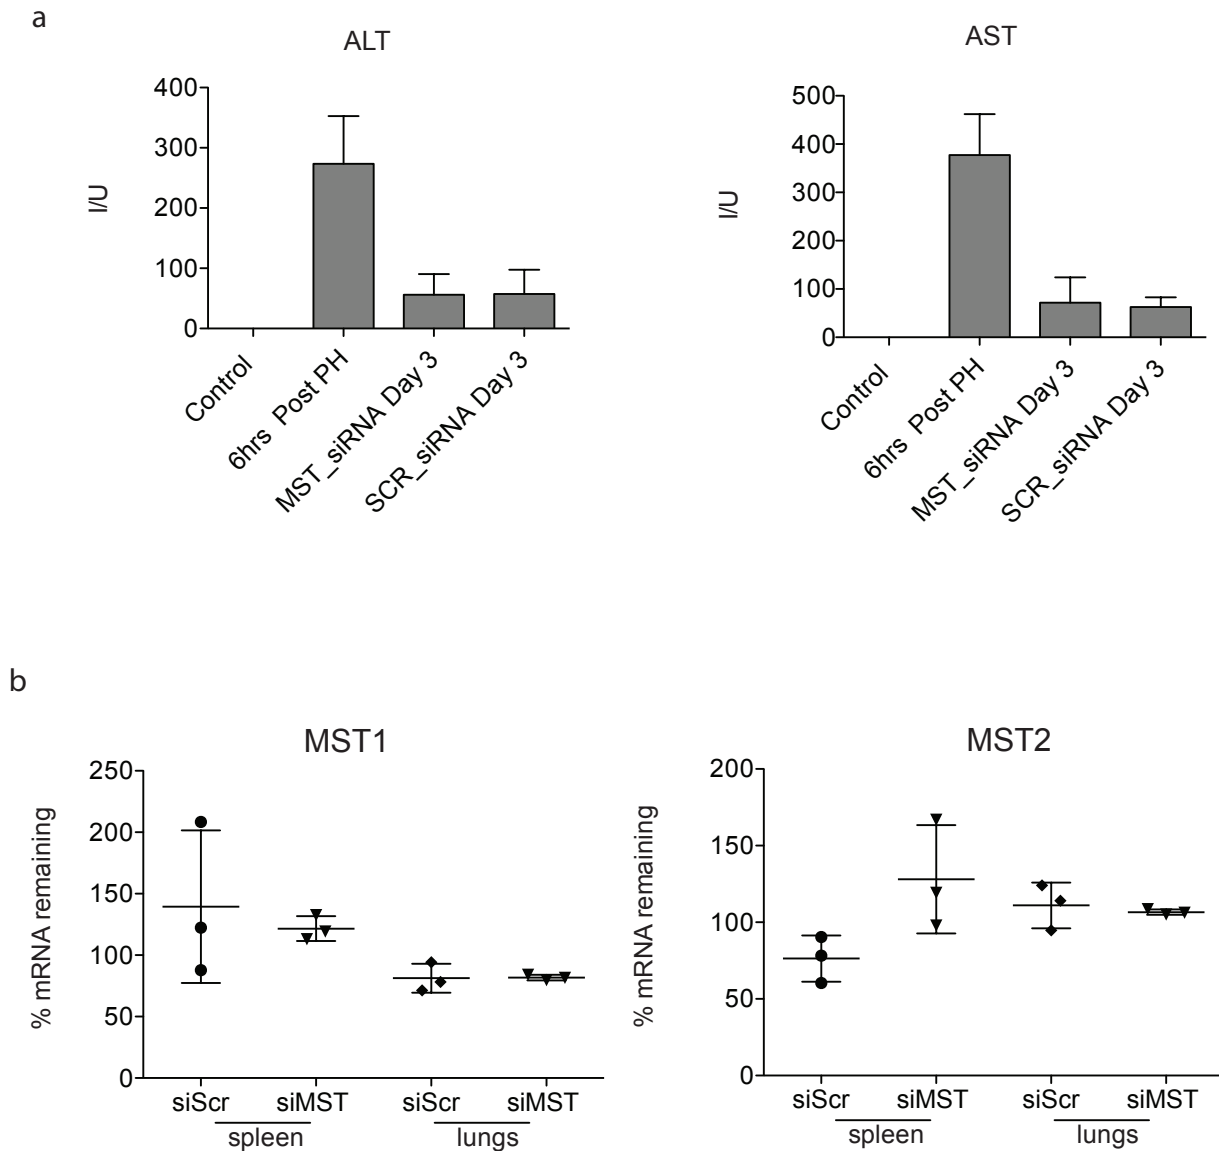

### Figure S8 Assessment of liver injury and off target effects from siRNA:liposomes

**A** Assessment of liver injury by serum levels of AST and ALT 6 h post PH (positive control) and day 3 after injection of liposome coupled siMST or siScr siRNA.

**B** RT-qPCR of mouse spleen and lung tissue after i.v injection of siScr or siMST liposome complex measured by RT-qPCR. Data are presented as mean  $\pm$  SD. Student's t-test was used to calculate p values of siScr to siMST treated animals, with no significant alterations observed.

## Appendix Figure S9

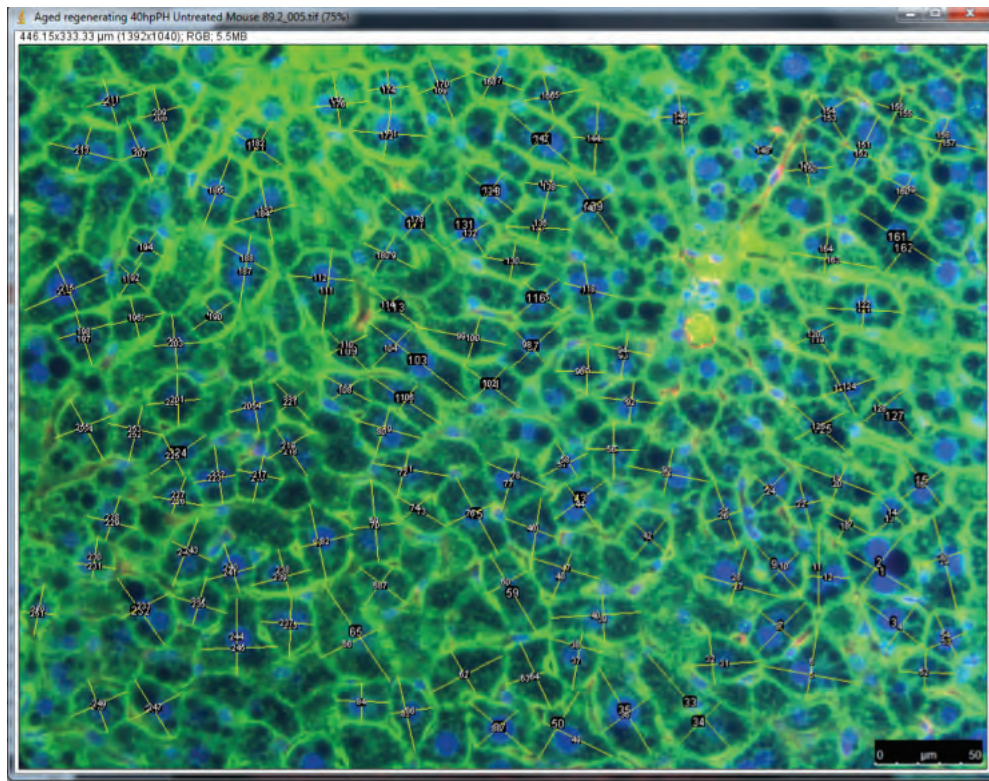

**Figure S9 Measurement of hepatocyte dimensions**

Representative photomicrograph of hepatocyte size calculation

Appendix Figure S10

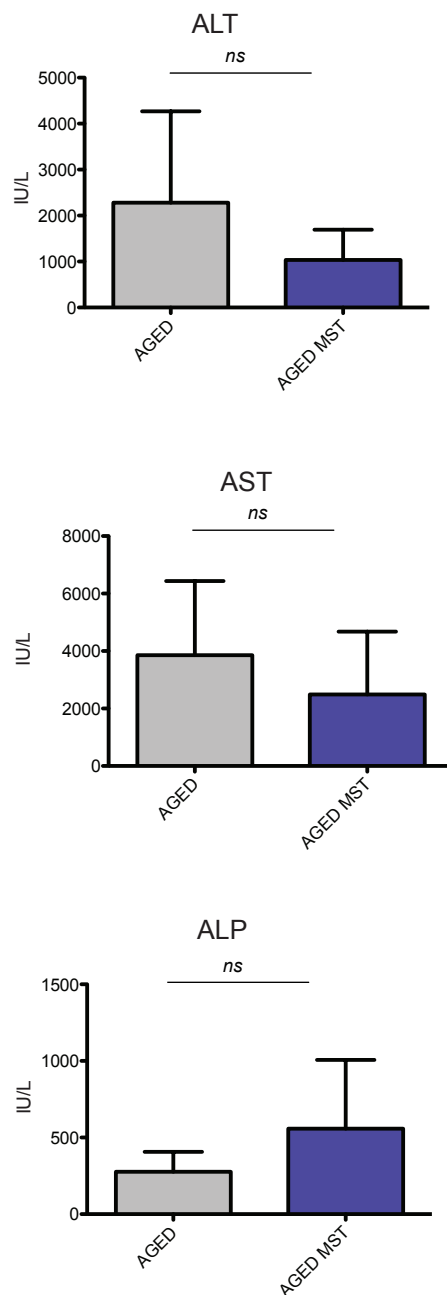

**Figure S10 Serum transaminases (ALT and AST) and alkaline phosphatase (ALP) in regenerating aged livers ± MST KD (aged MST)**

Data are represented as international units (IU) as measured in mice 40 h post PH in aged and aged + siMST KD mice. Bars are the mean ±SD, n=6 animals per group.
