# Supplementary material for: Impaired liver regeneration in aged mice can be rescued by silencing Hippo core kinases MST1 and MST2
Source: PubMed Central journal article supplement (PMC5210079; doi:10.15252/emmm.201506089), 2016-12-09
Supplement: EMMM-9-46-s003.pdf [file EMMM-9-46-s003.pdf]

Figure 1B

anti-p-MST

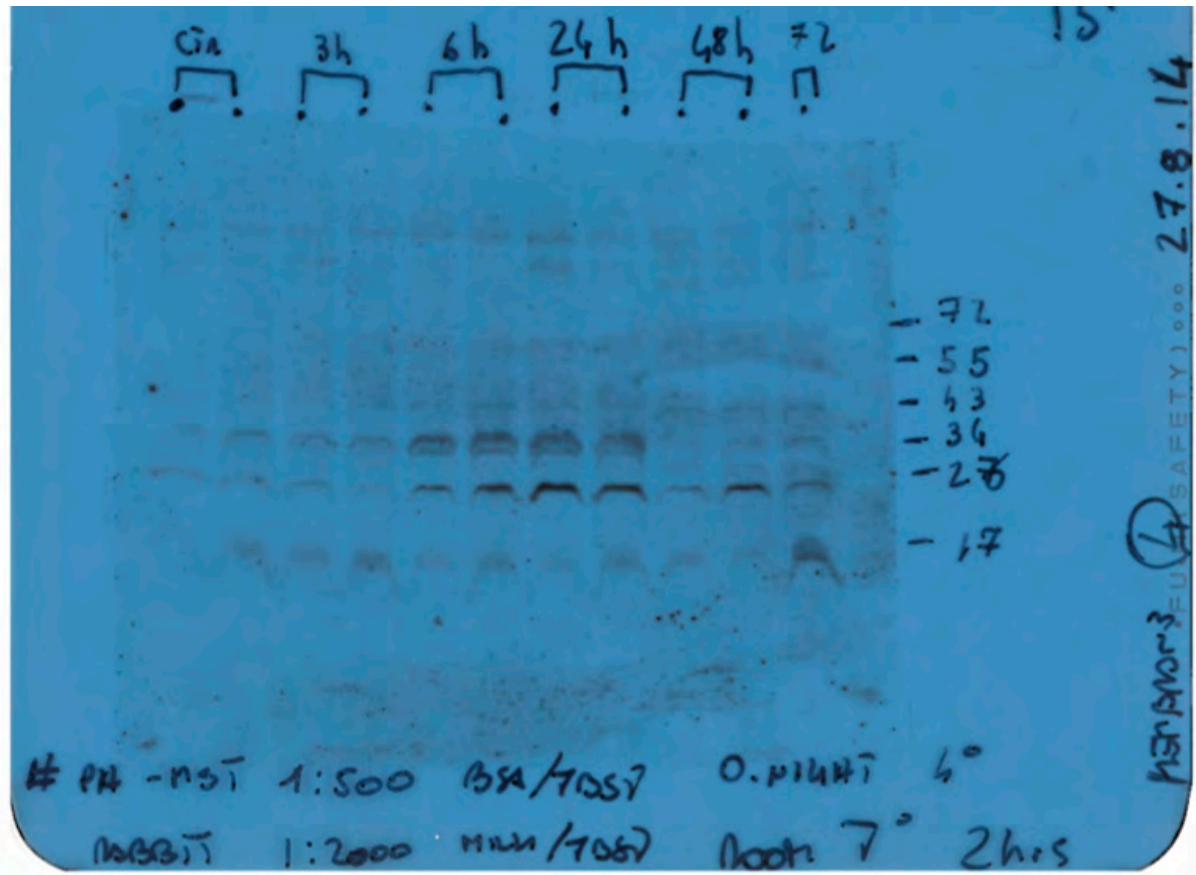

Figure 1B

anti-MST

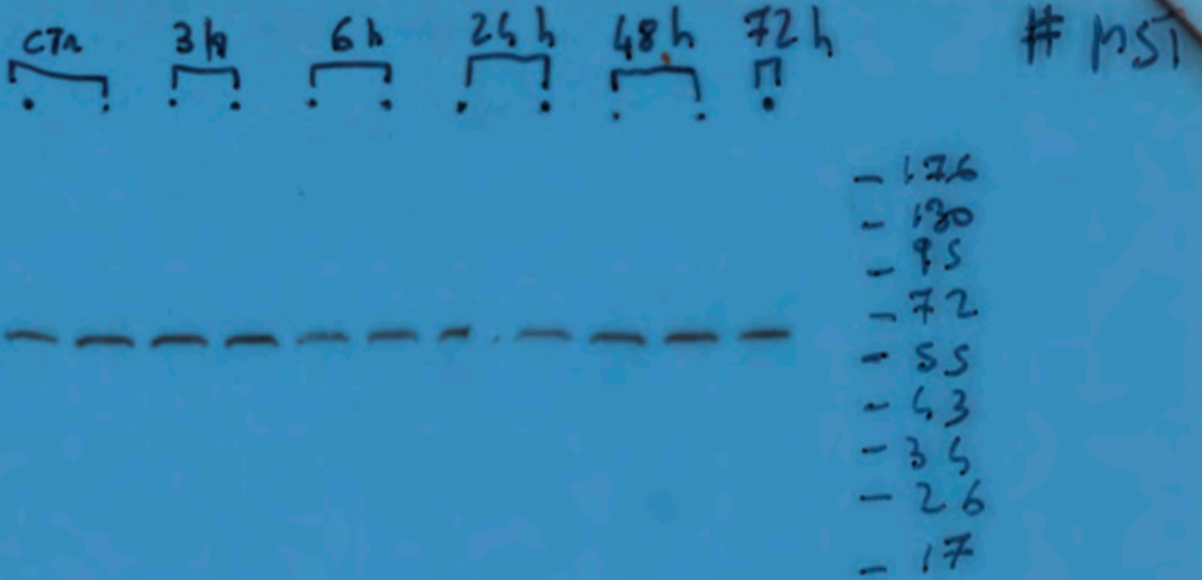

1:500 anti-MST 4° OVER NIGHT  
1:2000 anti-MST 2hrs Room T

MISMA. (3)  
PREVIOUSLY USED FOR  
LATS

- 126  
- 130

3011

# Figure 1B

anti-ph-LATS

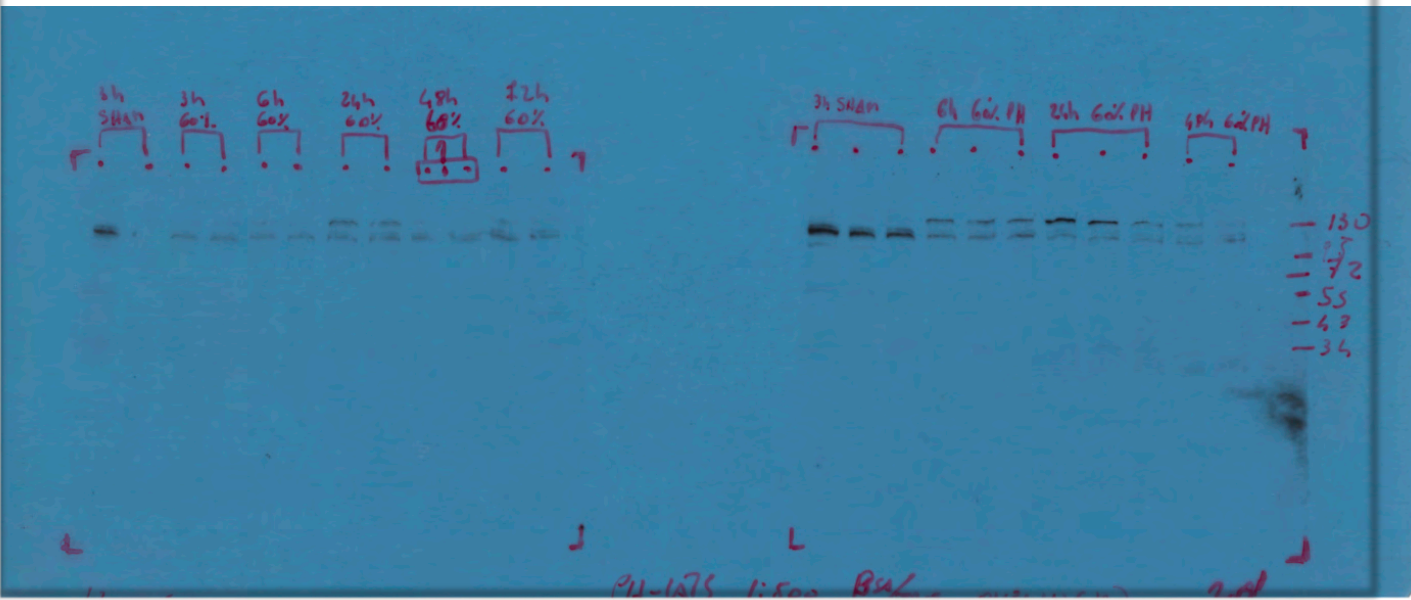

anti-LATS

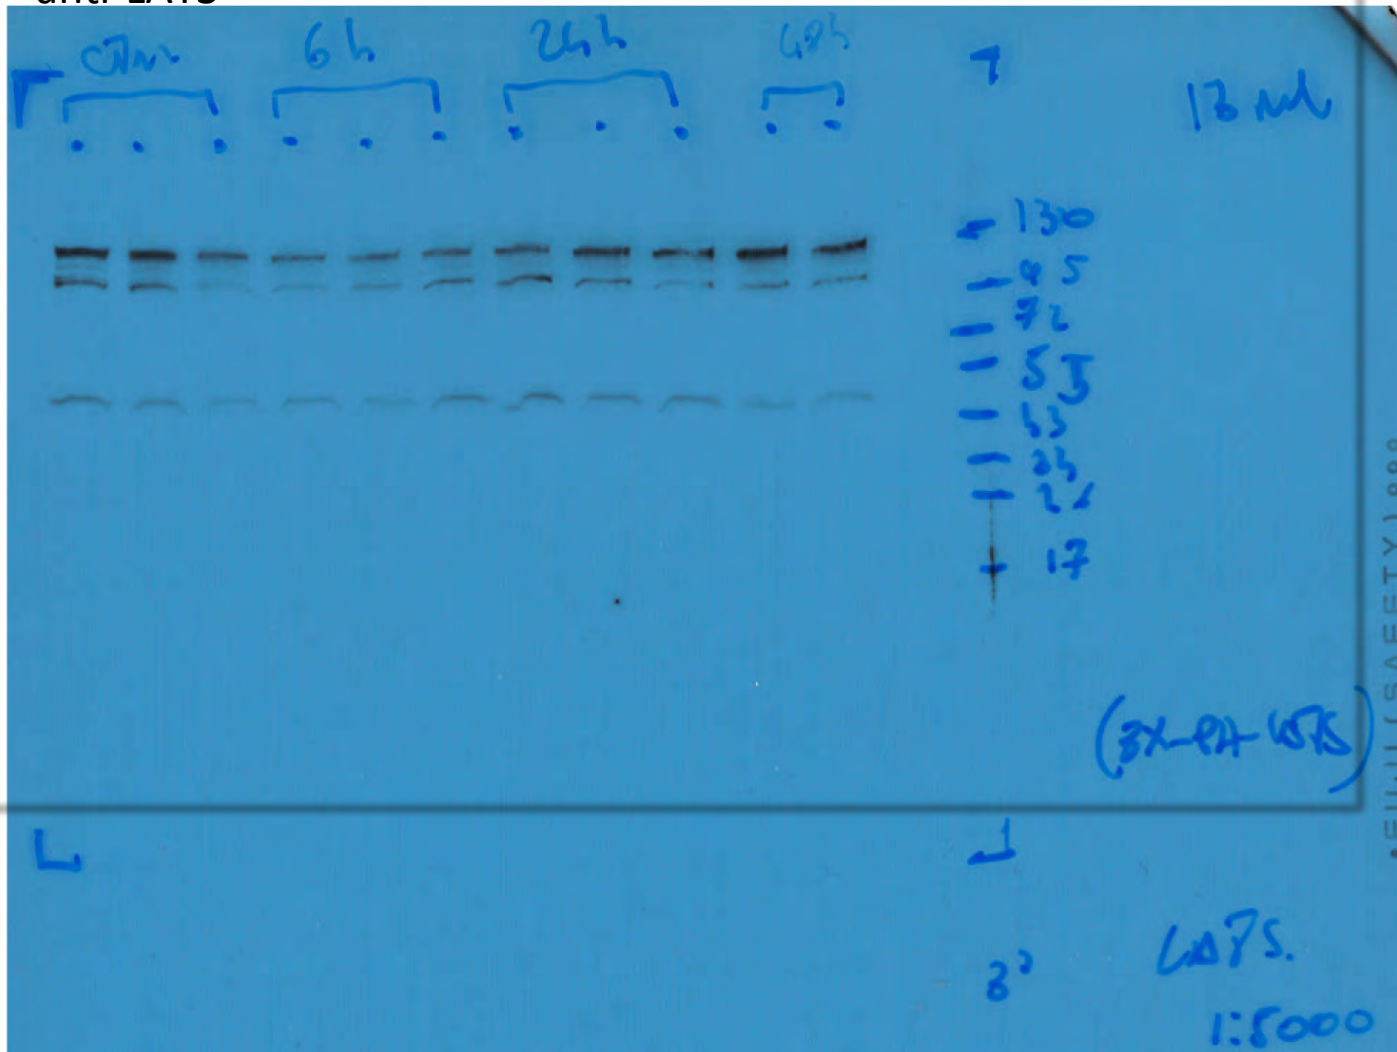

FUJI (SAFETY) 000

Figure 1B

anti-TBP

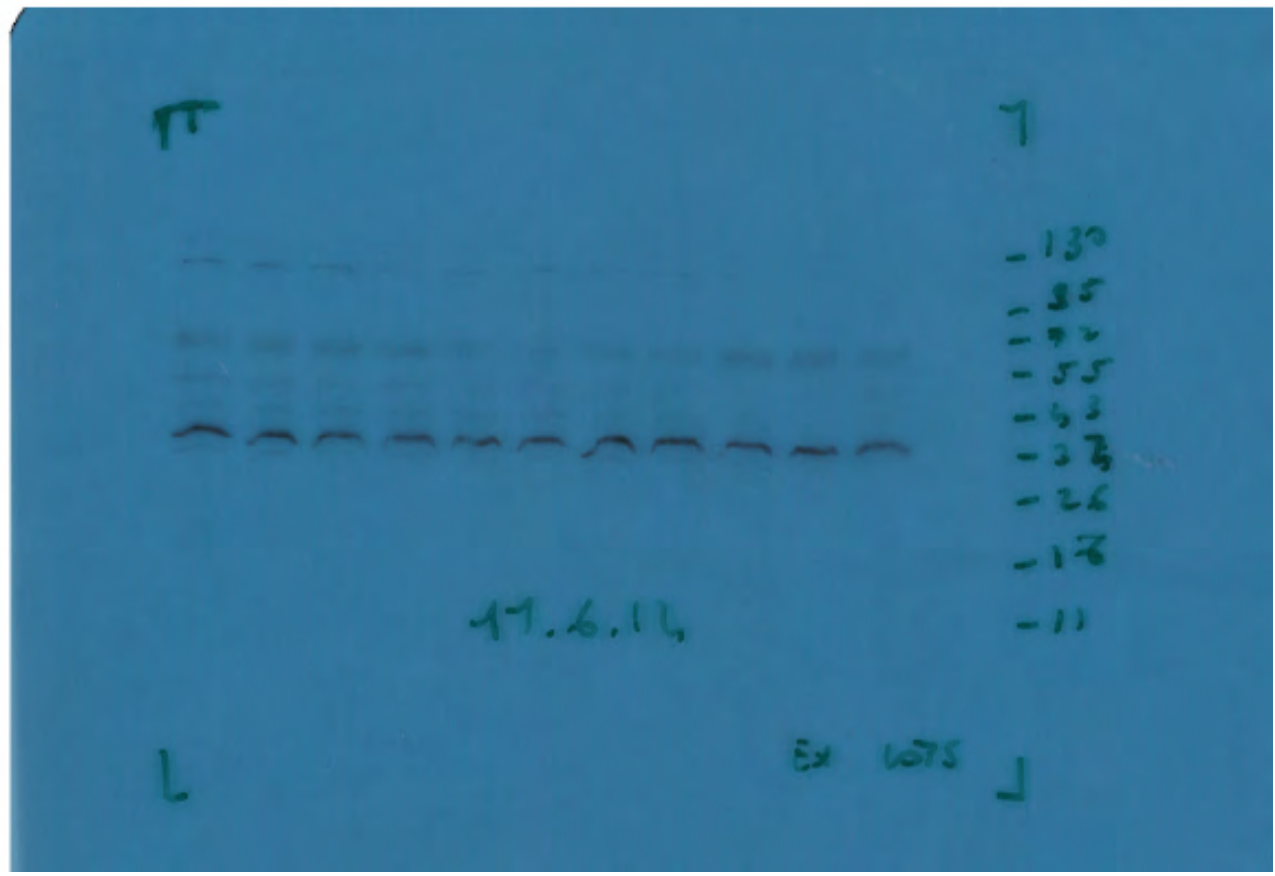

Figure 1C

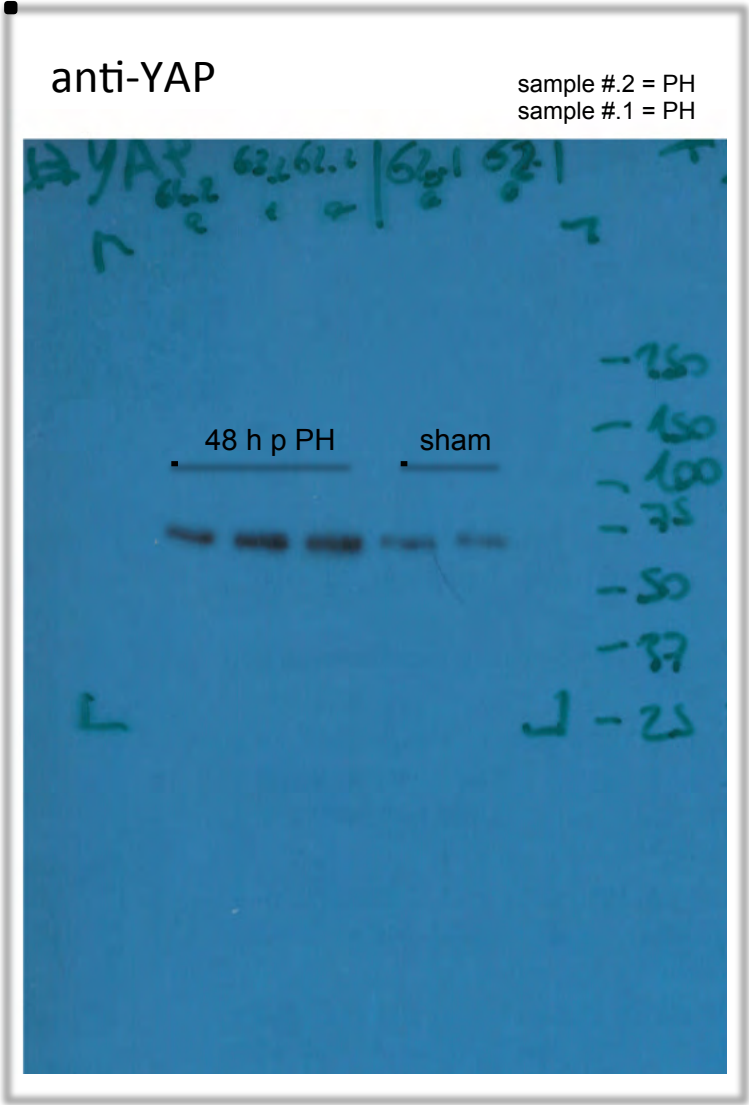

Figure 1E

anti-Yap/Taz

mouse hepatocytes  
control = 0h p PH (sham)

mouse hepatocytes  
isolated 48h p PH

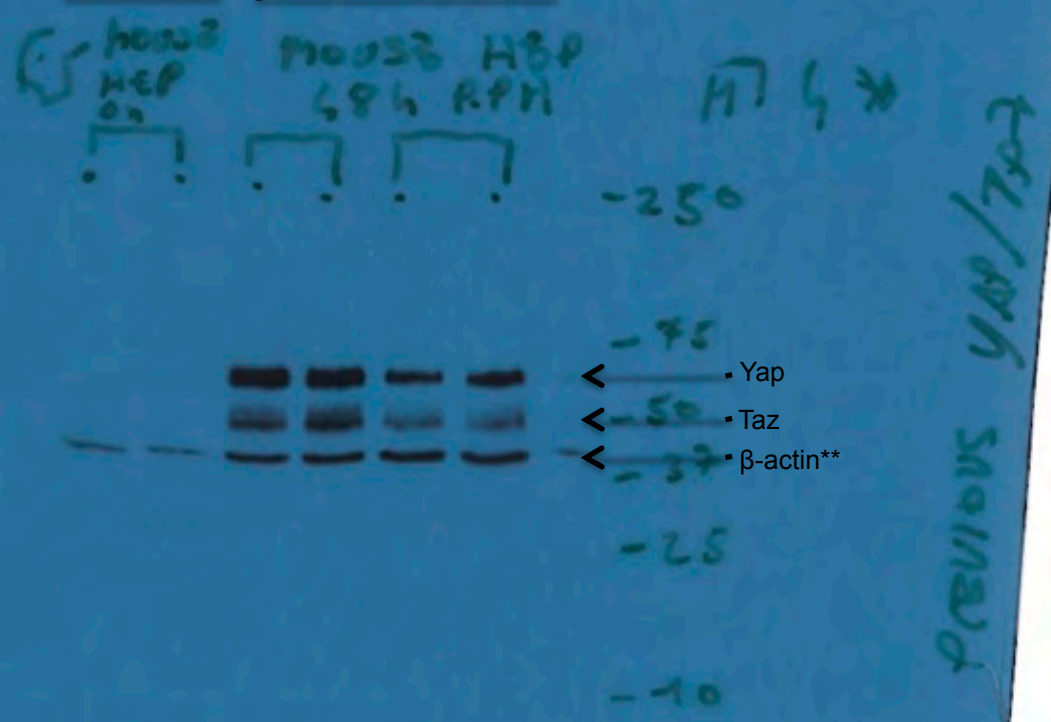

\*\*in figure,  $\beta$ -actin was taken from a longer exposed blot
