# Supplementary material for: Impaired liver regeneration in aged mice can be rescued by silencing Hippo core kinases MST1 and MST2
Source: PubMed Central journal article supplement (PMC5210079; doi:10.15252/emmm.201506089), 2016-12-09
Supplement: EMMM-9-46-s004.pdf [file EMMM-9-46-s004.pdf]

Figure 3A

anti-total MST

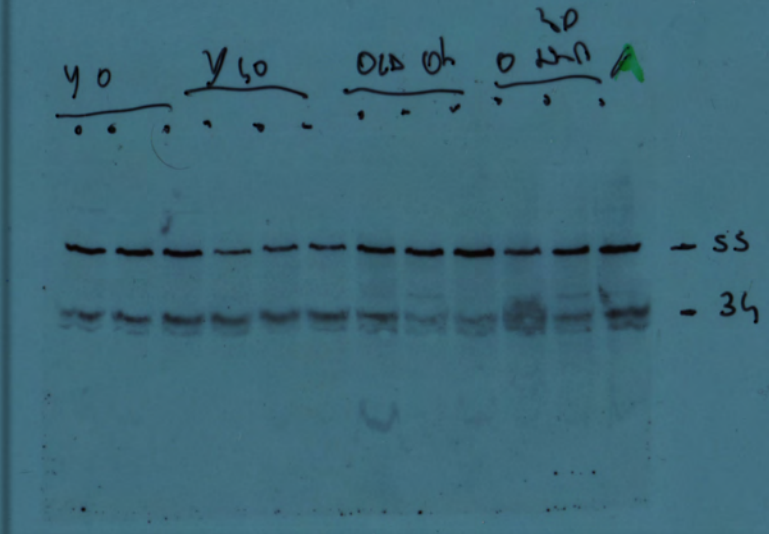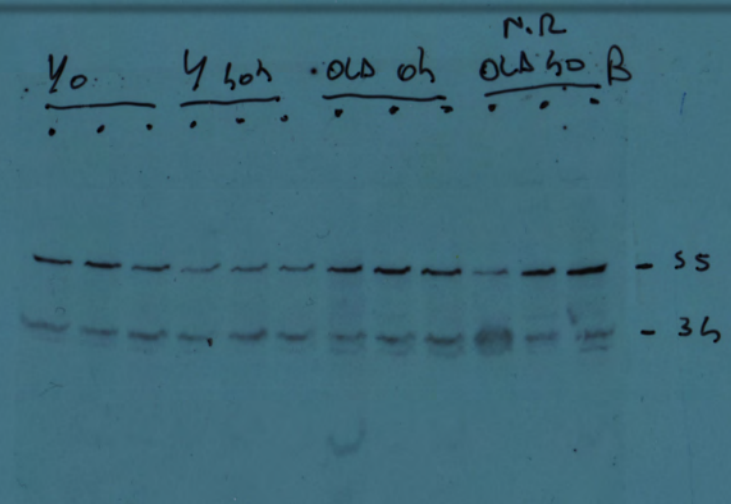

TOTAL MST 1:500 BSA/TBST

anti-p-MST

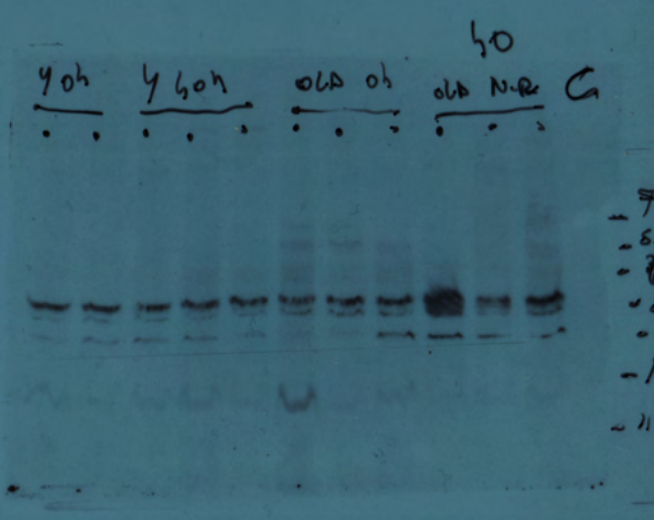

PH-MST 1:1000 BSA/TBST

2° WB 17 1:30 for ALL

15.9.15

Figure 3A

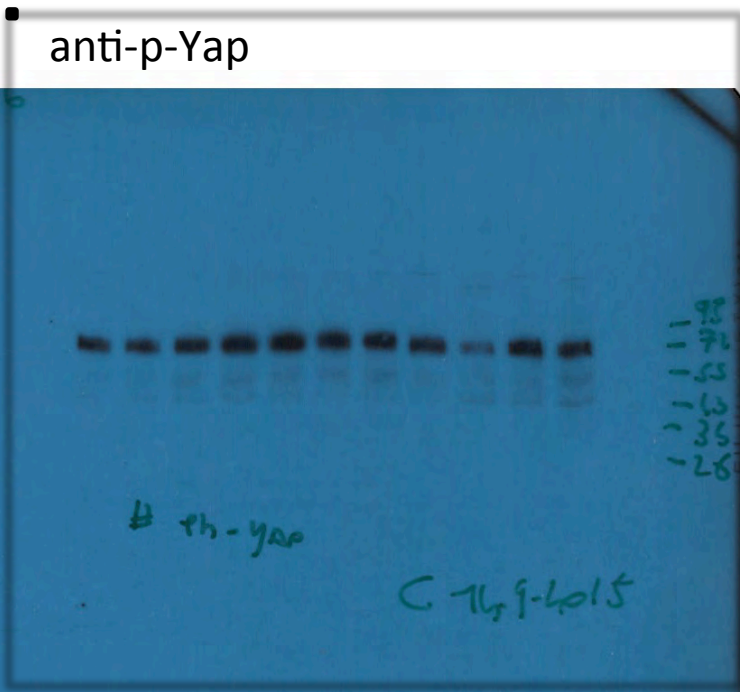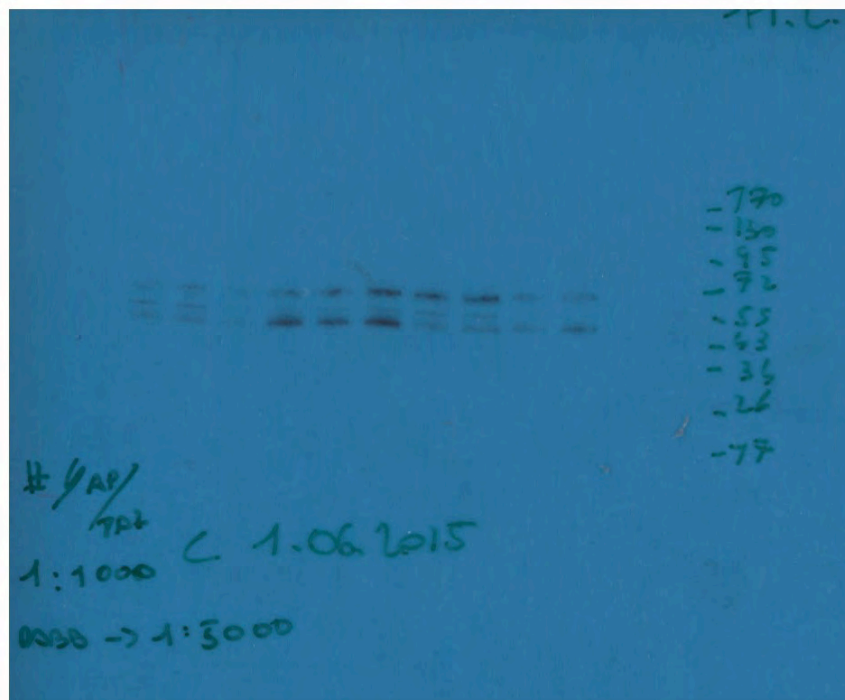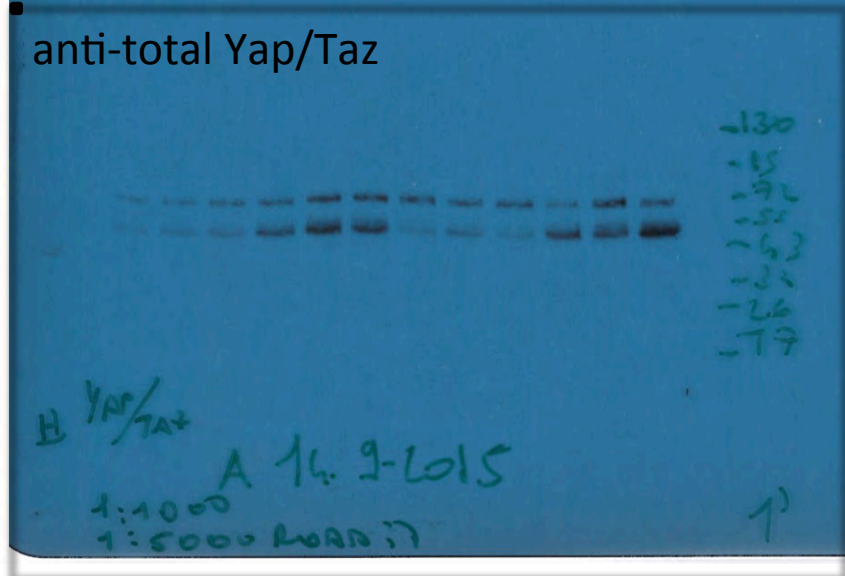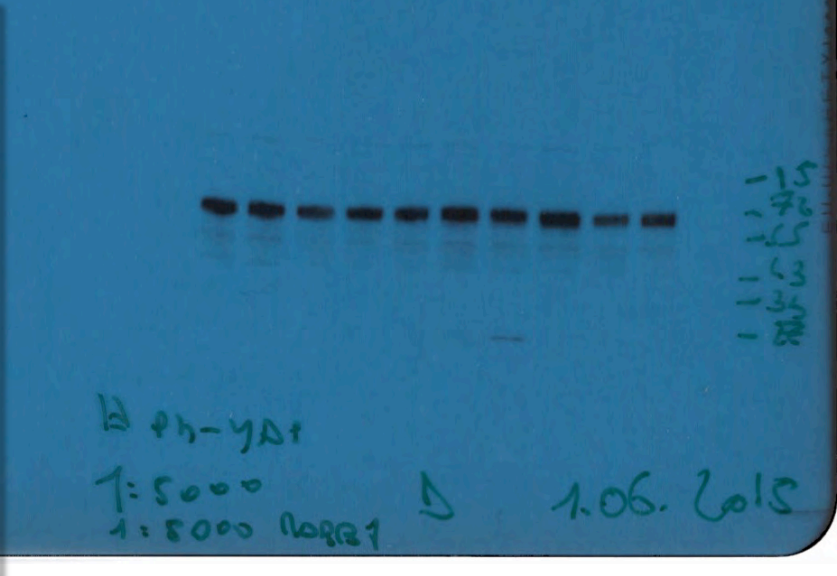

Figure 3A

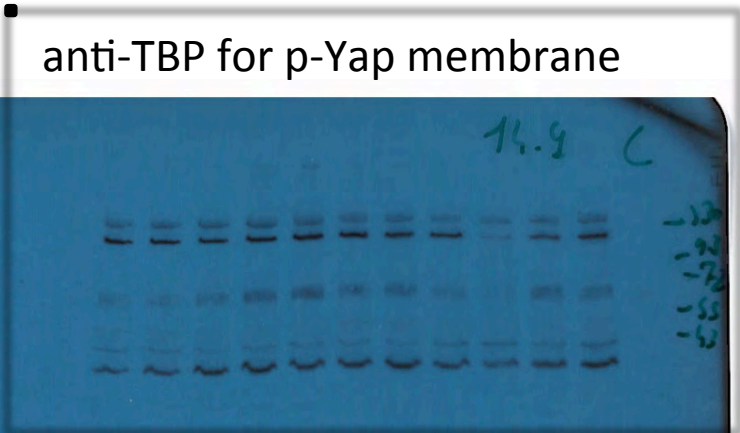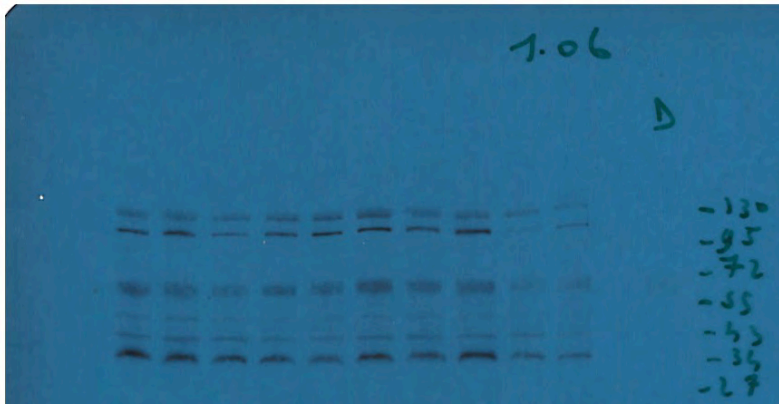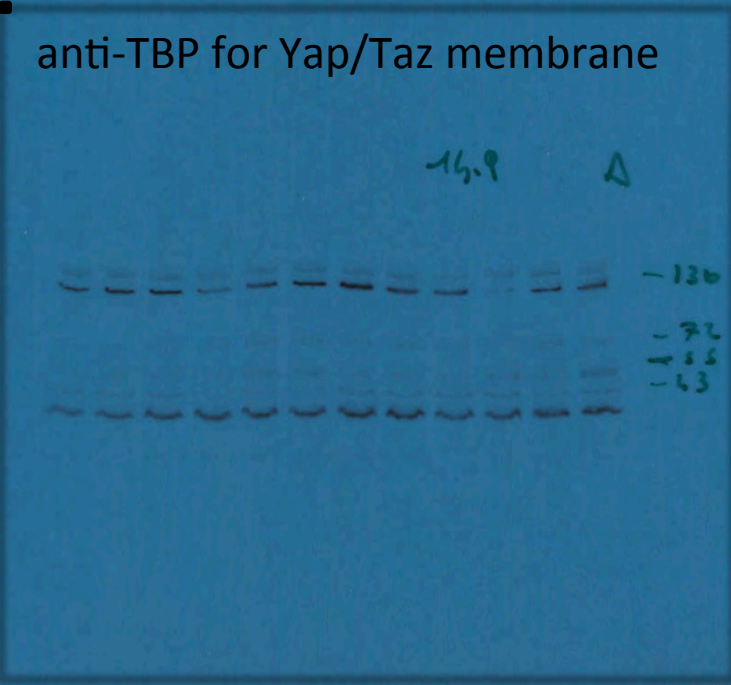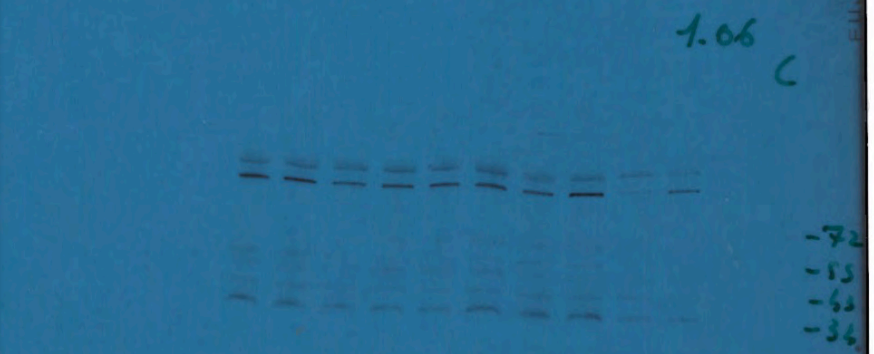

TBY 1:1000 MBB17 1:5000 28.2.2016
