# Supplementary material for: Impaired liver regeneration in aged mice can be rescued by silencing Hippo core kinases MST1 and MST2
Source: PubMed Central journal article supplement (PMC5210079; doi:10.15252/emmm.201506089), 2016-12-09

Figure 4B

anti- $\beta$ -actin

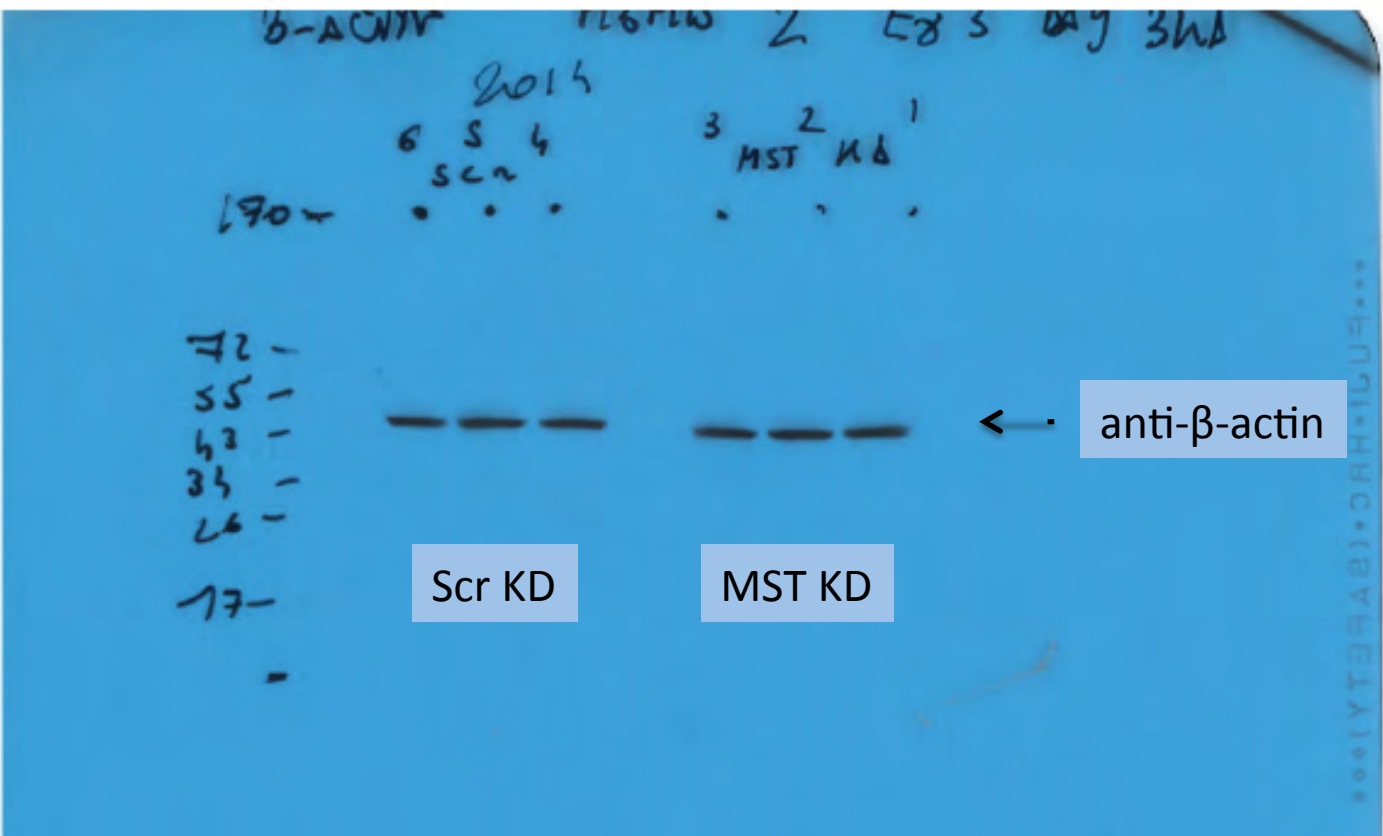

Supplement: EMMM-9-46-s005.pdf [file EMMM-9-46-s005.pdf]
